1 **Effect of *phyB* and *phyC* loss-of-function mutations on the wheat transcriptome under short**  
2 **and long day photoperiods**

3 Nestor Kippes<sup>1,5</sup>, Carl VanGessel<sup>2</sup>, James Hamilton<sup>2</sup>, Ani Akpinar<sup>3</sup>, Hikmet Budak<sup>3</sup>, Jorge  
4 Dubcovsky<sup>1,4</sup> and Stephen Pearce<sup>2,\*</sup>

5  
6 <sup>1</sup>Department of Plant Sciences, University of California, Davis, CA 95616, USA.

7 <sup>2</sup>Department of Soil and Crop Sciences, Colorado State University, Fort Collins, CO 80523,  
8 USA.

9 <sup>3</sup>Montana BioAg Inc., Missoula, MT 59802, USA.

10 <sup>4</sup>Howard Hughes Medical Institute, Chevy Chase, MD 20815, USA.

11 <sup>5</sup>Current address: Department of Plant Biology, UC Davis Genome Center, University of  
12 California, Davis, CA 95616, USA.

13

14

15 \*Corresponding author

16

17 Email addresses:

18 Nestor Kippes – [nfkippes@ucdavis.edu](mailto:nfkippes@ucdavis.edu)

19 Carl VanGessel – [Carl.VanGessel@colostate.edu](mailto:Carl.VanGessel@colostate.edu)

20 James Hamilton – [jrrhamilt@gmail.com](mailto:jrrhamilt@gmail.com)

- 21 Ani Akpınar – [aniakpinar@gmail.com](mailto:aniakpinar@gmail.com)
- 22 Hikmet Budak - [hikmet.budak@icloud.com](mailto:hikmet.budak@icloud.com)
- 23 Jorge Dubcovsky – [jdubcovsky@ucdavis.edu](mailto:jdubcovsky@ucdavis.edu)
- 24 Stephen Pearce – [stephen.pearce@colostate.edu](mailto:stephen.pearce@colostate.edu)

25 **Abstract**

26 **Background:** Photoperiod signals provide important cues by which plants regulate their growth  
27 and development in response to predictable seasonal changes. Phytochromes, a family of red and  
28 far-red light receptors, play critical roles in regulating flowering time in response to changing  
29 photoperiods. A previous study showed that loss-of-function mutations in either *PHYB* or *PHYC*  
30 result in large delays in heading time and in the differential regulation of a large number of genes  
31 in wheat plants grown in an inductive long day (LD) photoperiod.

32 **Results:** We found that under non-inductive short-day (SD) photoperiods, *phyB*-null and *phyC*-  
33 null mutants were taller, had a reduced number of tillers, longer and wider leaves, and headed  
34 later than wild-type plants. Unexpectedly, both mutants flowered earlier in SD than LD, the  
35 inverse response to that of wild-type plants. We observed a larger number of differentially  
36 expressed genes between mutants and wild-type under SD than under LD, and in both cases, the  
37 number was larger for *phyB* than for *phyC*. We identified subsets of differentially expressed and  
38 alternatively spliced genes that were specifically regulated by *PHYB* and *PHYC* in either SD or  
39 LD photoperiods, and a smaller set of genes that were regulated in both photoperiods. We  
40 observed significantly higher transcript levels of the flowering promoting genes *VRN-A1*, *PPD-*  
41 *B1* and *GIGANTEA* in the *phy*-null mutants in SD than in LD, which suggests that they could  
42 contribute to the earlier flowering of the *phy*-null mutants in SD than in LD.

43 **Conclusions:** Our study revealed an unexpected reversion of the wheat LD plants into SD plants  
44 in the *phyB*-null and *phyC*-null mutants and identified candidate genes potentially involved in  
45 this phenomenon. Our RNA-seq data provides insight into light signaling pathways in inductive  
46 and non-inductive photoperiods and a set of candidate genes to dissect the underlying  
47 developmental regulatory networks in wheat.

48 **Keywords:** Wheat, heading date, phytochrome, *FT1*, *FT2*, *FT3*, *PPD1*, *VRN1*.

## 49 **Background**

50 As sessile organisms, plants must be able to respond to fluctuations in their environment to  
51 maximize their reproductive success. To achieve this, plants have evolved a series of regulatory  
52 mechanisms to ensure that critical stages of their development coincide with optimal  
53 environmental conditions. One important determinant of reproductive success is flowering time,  
54 which is strongly influenced by seasonal changes in photoperiod and temperature [1]. In cereal  
55 crops, these cues are fundamental to ensure the plant does not flower too early, to prevent  
56 exposure of sensitive reproductive tissues to late-spring frosts, or too late, so as to minimize  
57 exposure to damaging high temperatures during grain filling [2]. There is a direct link between  
58 reproductive success and grain production, so characterizing the regulatory networks underlying  
59 flowering time is critical to support the development of resilient crop varieties, to help meet the  
60 world's growing demand for food [2].

61 Plants respond differently to seasonal variation in photoperiod according to the environment to  
62 which they are adapted. Whereas some plant species exhibit accelerated flowering in short day  
63 photoperiods (SD plants), others flower more rapidly in long days (LD plants). A third class of  
64 plants are day-neutral and flower irrespective of the photoperiod. The temperate cereals,  
65 including common wheat (*Triticum aestivum* L.), are LD plants. This ensures that plants remain  
66 in a vegetative phase during winter until the lengthening days of spring trigger the irreversible  
67 transition to reproductive development [1]. An additional requirement for a long period at low  
68 temperatures (vernalization) prevents flowering during the fall, when the days are still relatively  
69 long [3].

70 In wheat and other temperate cereals, the length of the night, rather than the length of the day, is  
71 critical for the perception of inductive photoperiods. This has been demonstrated by experiments  
72 in which exposing wheat plants to night-breaks (15 min periods of light in the middle of a long  
73 night) for at least 12 d was sufficient to accelerate flowering [4]. Loss-of-function mutations in  
74 the wheat phytochrome genes *PHYTOCHROME B* (*PHYB*) or *PHYC*, or in the  
75 *PHOTOPERIOD1* (*PPD1*) gene abolish the acceleration of flowering by night-breaks,  
76 suggesting that these genes are critical to measure the duration of the night [4].

77 A recent study in *Brachypodium* proposed a mechanism for the role of these genes in the  
78 determination of the photoperiodic response [5]. Phytochromes, a class of red (R, ~650 nm) and  
79 far-red (FR, ~720 nm) light receptors exist as one of two interchangeable forms, P<sub>R</sub> and P<sub>FR</sub>. In  
80 darkness, the biologically inactive P<sub>R</sub> form accumulates in the cytoplasm, but upon absorption of  
81 R light, P<sub>R</sub> is converted to the bioactive P<sub>FR</sub> form and is translocated to the nucleus [6-8].  
82 Conversely, exposure to FR light causes the rapid reversion of P<sub>FR</sub> to the P<sub>R</sub> form, a reaction that  
83 also takes place more gradually during the night (dark or thermal reversion). Therefore, the  
84 duration of the night affects the amount of the bioactive P<sub>FR</sub> form, which has been proposed to be  
85 critical for the degradation of the clock protein EARLY FLOWERING 3 (ELF3), a direct  
86 repressor of *PPD1* [5]. High ELF3 protein levels and the repression of *PPD1* have been  
87 proposed as the main cause of the late flowering phenotypes of the *phyC* mutant in  
88 *Brachypodium* [5].

89 *PPD1* encodes a PSEUDO-RESPONSE REGULATOR (PRR)-family protein that acts as a  
90 positive regulator of flowering in the LD grasses [9-11] but as a LD-repressor in the SD grasses  
91 rice [12] and sorghum [13], where this gene is referred to as *PRR37*. In wheat, allelic variation at  
92 the *PPD1* locus affects photoperiod sensitivity. Whereas the wild-type *Ppd-A1b* allele is

93 expressed at very low levels during the night, the *Ppd-A1a* allele, which carries a promoter  
94 deletion encompassing the ELF3 binding site, shows increased transcript levels during the day  
95 and, particularly, at night [14]. Wheat varieties that carry the *Ppd-A1b* allele are referred to as  
96 photoperiod sensitive (PS) and those that carry *Ppd-A1a* as photoperiod insensitive (PI) because  
97 they exhibit accelerated heading under SD and reduced differences in heading time between SD  
98 and LD. It is important to point out that wheat varieties carrying the PI allele still show a  
99 significant acceleration of heading under LD [9, 11]. *PPD1* induces the expression of  
100 *FLOWERING LOCUS T1 (FT1)*, which encodes a protein with similarity to the PEBP family  
101 [15]. The FT1 protein is translocated through the phloem to the shoot apical meristem, where it  
102 forms a hexameric floral activation complex that directly activates the expression of meristem  
103 identity genes including *VERNALIZATION 1 (VRN1)* and *FRUITFULL 2 (FUL2)*. These MADS-  
104 box genes play critical roles in triggering reproductive development [16-18]. In the cereals, *ft1*-  
105 null mutants exhibit a strong delay in flowering [19].

106 In addition to their role in the regulation of ELF3, bioactive P<sub>FR</sub> phytochromes interact in the  
107 nucleus directly with PHYTOCHROME INTERACTING FAMILY (PIF) proteins, a class of  
108 bHLH transcription factors [20, 21]. In Arabidopsis, these interactions induce biochemical  
109 changes in the PIF proteins, which result in their ubiquitination and degradation via the 26S  
110 proteasome pathway [22]. In this species, accumulating PIF proteins act primarily as negative  
111 regulators of light signaling transcriptional networks, so their degradation in response to R light  
112 triggers a cascade of photoperiod-mediated transcriptional responses. Despite its important role  
113 in the light signaling pathway in Arabidopsis, the role of PIF proteins in the regulation of the  
114 photoperiod response in the temperate cereals remains unknown.

115 Phytochromes can also induce transcriptional variation through modulating alternative splicing  
116 (AS) [23]. In *Arabidopsis*, changes in AS were detected in over 1,500 genes in response to R  
117 light, in a PHYB-dependent manner [23]. These target genes include PIF3, whereby greater  
118 levels of P<sub>FR</sub> PHYB increased the frequency of an intron retention event in this gene, disrupting  
119 the translated protein's function [24]. In the moss *Physcomitrella patens*, the phytochrome  
120 protein PpPHY4 interacts directly with a splicing regulator to mediate AS in response to light  
121 [25]. Previously, the splicing factor RRC was found to mediate phytochrome response in  
122 *Arabidopsis*, suggesting this mechanism may be conserved in angiosperms [26].

123 Monocot genomes contain three phytochrome genes, *PHYA*, *PHYB* and *PHYC*, with three  
124 homeologous copies of each gene in hexaploid wheat [27]. In wheat and *Brachypodium*, both  
125 *PHYB* and *PHYC* are required for timely flowering in LD conditions and plants carrying non-  
126 functional copies of either phytochrome exhibit extreme delays in flowering, as well as changes  
127 in their vegetative morphology [28-30]. Using *phyB*-null and *phyC*-null Ethyl-methane sulfonate  
128 (EMS)-derived mutants in the tetraploid wheat variety 'Kronos', we previously described the  
129 sets of genes regulated by *PHYB* and *PHYC* in LDs [31]. Despite similar delays in flowering  
130 time in both mutants, we found that *PHYB* regulates approximately six times as many genes as  
131 *PHYC*, and that only a small core of 104 genes were regulated by both phytochromes at the  
132 transcriptional level [31]. These commonly regulated genes include several well-characterized  
133 flowering time genes, such as *PPD1* and *FT1*, and meristem identity genes, including *VRN1* and  
134 *FUL2*.

135 The role of the wheat phytochromes in non-inductive photoperiods remains an open question.  
136 Previously, we found that while *phyC*-null mutants flower later than WT plants in both SD and  
137 LD photoperiods, the effect is approximately five-fold smaller in SDs [28]. There is a significant

138 interaction between photoperiod and *PHYC*, with the wild-type plants heading earlier in LDs  
139 than in SDs, and the *phyC*-null mutants heading earlier in SDs than LDs [28]. In the current  
140 study, we found that *phyB*-null Kronos mutants also flower significantly earlier in SD than in  
141 LD.

142 To characterize the genes involved in the earlier heading of the *phyB*-null and *phyC*-null mutants  
143 in SDs than in LDs, we compared the transcriptomes of these mutants under SD and LD  
144 conditions. We identified sets of genes regulated by *PHYB* and *PHYC* in both SD and LD  
145 photoperiods, as well as genes that were regulated only under a specific photoperiod. In addition,  
146 we found that both *PHYB* and *PHYC* regulate alternative splicing events in a number of genes, of  
147 which only a small proportion also showed significant differences in transcript levels between  
148 wild-type and *phy* mutants. The findings of this study contribute to our understanding of the  
149 complex regulatory networks controlling photoperiod-mediated flowering in wheat.

150

## 151 **Results**

### 152 **Effect of *phyB*-null and *phyC*-null mutants on heading time**

153 We first characterized the effect of Kronos-*phyB*-null and Kronos-*phyC*-null mutants on heading  
154 time under LD and SD conditions relative to wild-type Kronos (WT), a photoperiod insensitive  
155 (*Ppd-A1a*) spring wheat (*Vrn-A1*). The wild-type Kronos headed at 47 d in LD and at 95 d in SD  
156 (48 d delay,  $P < 0.0001$ ), as expected for a LD plant. This result showed that Kronos plants  
157 carrying the *Ppd-A1a* allele still respond to changes in photoperiod. By contrast, both *phyB*-null  
158 and *phyC*-null mutants headed earlier in SD than in LD (108 d earlier for *phyB*-null,  $P < 0.001$ ,  
159 Figure 1a, 23 d earlier for *phyC*-null,  $P < 0.001$ , Figure 1b). This reversal was the result of a



160 much larger delay in heading time in the null mutants under LD (104 d and 196 d later than WT)  
161 than under SD (31 d and 39 d later than WT,  $P < 0.0001$ , Figure 1a-b). The interactions between  
162 photoperiod and genotype were significant for both *PHYB* and *PHYC* (Figure 1a-b,  $P < 0.0001$ )  
163 [28].

164 Kronos plants carrying a single null allele in either the A or B homeologs of *PHYB* or *PHYC*  
165 showed no significant delay in heading date relative to the WT (Additional file 1, Figure S1) and  
166 the same was observed for other traits, so all subsequent results describe comparisons between  
167 *phyB*-null, *phyC*-null mutants and the WT in a Kronos-PI background.

#### 168 ***Effect of phyB-null and phyC-null mutants on plant phenotype under SD***

169 We next characterized the vegetative phenotypes of these mutant lines under SD conditions.  
170 Tiller number was significantly lower in both mutants compared to the WT (Figure 1c), while  
171 mean leaf number per tiller was significantly higher in both mutants than in WT plants (Figure  
172 1d), likely due to the delayed transition of the shoot apical meristem to the reproductive phase. In  
173 both *phyB*-null and *phyC*-null mutants, flag leaves were significantly longer and wider than WT  
174 (Figure 1e-f).

175 Stem development was also affected in the *phy* mutants. Both mutants were significantly taller  
176 than WT plants (*phyB*-null 310 mm taller,  $P = 9.72^{E-06}$  and *phyC*-null 220 mm taller,  $P =$   
177 0.00016, Figure 1g). While the *phyB*-null and *phyC*-null mutants did not differ significantly from  
178 one another in overall height, their stem structure was markedly different. The *phyB*-null mutants  
179 exhibited a larger number of internodes than either WT (9 more internodes than WT,  $P = 7.14^{E-}$   
180  $09$ ) or *phyC*-null mutants (7 more internodes than *phyC*,  $P = 3.53^{E-07}$ ), while *phyC*-null plants had  
181 a slightly increased internode number compared to the WT control (2.1 more internodes,  $P =$   
182 0.00013, Figure 1g). Representative plants of each genotype are shown in figure 1h, which was

183 taken when *phyB*-null mutants reached heading date. Taken together, these results show that both  
184 *PHYB* and *PHYC* play important roles in regulating vegetative and reproductive development in  
185 non-inductive SD conditions.

### 186 **Characterizing the *PHYB*- and *PHYC*-regulated wheat transcriptome under SD**

187 To investigate the transcriptional changes associated with the earlier flowering of the *phyB*-null  
188 and *phyC*-null plants relative to WT in the Kronos background, we performed an RNA-seq  
189 experiment in WT, *phyB*-null and *phyC*-null plants under SD conditions. We collected tissue  
190 from the last fully expanded leaf of four biological replicates per genotype at eight-weeks of age  
191 (Additional file 1, Figure S2). To facilitate comparison with a previous RNA-seq study of the  
192 same materials in LD conditions [31], we took samples at the same point of the photoperiod  
193 (four hours after dawn). We harvested tissues from eight-week-old plants in our SD experiment  
194 so the wild-type plants were at a similar developmental stage as the wild-type plants in the LD  
195 RNA-seq study, which were sampled at four-weeks of age.

196 After trimming raw reads for quality and adapter contamination, an average of 45.0 M trimmed  
197 100 bp single-end reads per sample were mapped to unique positions in the IWGSC RefSeq v1.0  
198 genome assembly (Additional file 1, Table S1). Using all normalized read counts mapped to high  
199 and low confidence gene models for each sample, we generated a multi-dimensional scaling  
200 (MDS) plot (Figure 2a). Samples grouped into three distinct clusters according to their genotype,  
201 reflecting consistent differences in overall transcriptome profile between genotypes and limited  
202 differences among biological replicates (Figure 2a).

203 We next performed pairwise comparisons between WT and both mutants to identify *PHYB*- and  
204 *PHYC*- differentially expressed (DE) genes under SD conditions. We found that 4.8 times as  
205 many genes were regulated by *PHYB* (7,272 DE genes) than by *PHYC* (1,511 DE genes, Figure

206 2b). Among these DE genes, a greater proportion were positively regulated by *PHYB* (59.7%  
207 with higher expression in WT than *phyB*-null) than by *PHYC* (50.6% of genes). There were 815  
208 genes regulated by both *PHYB* and *PHYC*, including 783 genes regulated in the same direction  
209 and 27 in the opposite direction (upregulated by *PHYB* and downregulated by *PHYC* or vice  
210 versa, Figure 2b). Full details of expression data and statistical tests for each pairwise  
211 comparison are provided in Additional file 2.

212 To identify putative functions associated with these transcriptional changes, we performed a GO  
213 enrichment analysis for each subset of differentially expressed genes. Among the 7,272 genes  
214 regulated by *PHYB* in SDs, the most significantly enriched terms included ‘oxidation-reduction  
215 process’ and ‘protein phosphorylation’, while among the 1,511 genes regulated by *PHYC*,  
216 significant terms included ‘defense response’ and ‘cellular iron homeostasis’ (Additional file 1,  
217 Table S2). In genes commonly regulated by both *PHYB* and *PHYC*, enriched terms included  
218 ‘defense response’ and ‘protein phosphorylation’ (Additional file 1, Table S2).

219 Changes in development are often associated with differential expression of genes encoding  
220 transcription factors. Compared to the overall proportion of genes encoding transcription factors  
221 in our dataset (3.2% of 72,120 expressed genes), an increase was observed for the *PHYB*- (5.3%)  
222 and *PHYC*-regulated genes (5.4%), and an even larger increase was detected among the genes  
223 regulated by both *PHYB* and *PHYC* (6.5%). More importantly, several critical genes involved in  
224 the regulation of flowering were differentially expressed in *phyB* and *phyC* relative to the WT.  
225 Transcript levels of *PPD-B1*, both homeologs of *FT1* and *FT2*, *VRN-B1* and *SOC1* were all  
226 significantly lower in both *phyB*-null and *phyC*-null mutants compared to WT plants (Additional  
227 file 2).

228 To validate these expression data and to study longer-term trends of the expression of these  
229 genes in SD conditions, we performed qRT-PCR analysis for selected candidate genes across six  
230 time points, using the same genotypes as in the RNA-seq analysis. At the eight-week time point,  
231 the qRT-PCR experiment confirmed the RNA-seq results, showing that transcript levels of  
232 *VRN1*, *FT1*, *FT2*, *PPD1* and *FT3* were all significantly lower in *phyB*-null and *phyC*-null  
233 mutants compared to WT (Figure 3). *PPD1* expression was significantly higher in WT than  
234 either mutant at all assayed time points. It is important to note that these values represent the  
235 combined transcript levels of *Ppd-A1a* and *Ppd-B1b* homeologs.

236 There were also differences in the expression profiles of members of the *FT-like* family between  
237 genotypes. In wild-type plants, *FT1* transcript levels were more than double the levels of *FT2* at  
238 the 5 w and 8 w time points (Figure 3), consistent with results from a previous study [32]. By  
239 contrast, in both *phyB* and *phyC* plants, *FT2* was upregulated at an earlier time point (14 w) than  
240 *FT1*, which increased in expression at 17 w in *phyC* mutants, but remained low throughout the  
241 experiment in *phyB* mutants (Figure 3). *FT3* was expressed at much lower levels than *FT1* and  
242 *FT2*, and in the wild-type both *FT-A3* and *FT-B3* showed a transient peak in expression at 8 w.  
243 In the *phyC* mutant, *FT3* levels started to increase at 14 w and were even higher at 17 w, whereas  
244 in the *phyB* mutant we only observed upregulation of *FT-A3* at 17 w (Figure 3). *VRN1*  
245 expression increased gradually in both mutant lines throughout this time course, but its transcript  
246 levels remained significantly lower than in WT lines at all time points from 5 w onwards (Figure  
247 3).

248 Taken together, these differences in expression between phytochrome mutants and WT are  
249 consistent with the delayed heading date of *phyB* and *phyC* mutants compared to WT. These  
250 results also confirm that phytochromes play an important role in the regulation of critical

251 flowering genes under both SD and LD photoperiods. The earlier expression of *FT2* relative to  
252 *FT1* and its high transcript levels (Figure 3), suggest that this gene may play a more important  
253 role in the early flowering of the phytochrome mutants under SD than under LD.

#### 254 **Effect of photoperiod on phytochrome-regulated genes**

255 To explore the effect of photoperiod on the differences between WT and the phytochrome  
256 mutants, we compared the DE genes generated in the current study in SD collected from 8-week-  
257 old plants, with the DE genes in a previous dataset that used the same plant materials grown in  
258 LD conditions collected from 4-week-old plants [31]. This SD time point was chosen to match  
259 developmental stage in the WT plants between SD and LD conditions (Waddington stage 3  
260 [33]).

261 To allow a direct comparison between datasets, we remapped the RNA-seq reads from our  
262 earlier LD study to the IWGSC RefSeq v1.0 genome assembly using the same mapping and  
263 quantification parameters adjusted for read length. Using this updated genomic reference, 52.8%  
264 of all reads mapped uniquely (Additional file 1, Table S3). This LD dataset includes two  
265 experimental replicates, each with four biological replications. Genes were considered  
266 differentially expressed only when significant in both experiments. This approach reduces the  
267 false positive rate, but means that direct comparisons of the number of differentially expressed  
268 genes between SD and LD datasets should be approached with caution because SD data  
269 represents only a single experimental replicate.

270 An MDS-plot separating the samples on the basis of their whole transcriptomic profiles revealed  
271 a high consistency between experimental replicates, but wider differences between genotypic  
272 classes (Additional file 1, Figure S3). We identified 3,668 genes that were differentially  
273 expressed between WT and *phyB*-null mutants in both experimental replicates and 424 genes for

274 the corresponding comparisons with the *phyC*-null mutant. Just 141 of these genes were  
275 regulated by both *PHYB* and *PHYC* under LD conditions. With slight variations, these results are  
276 consistent with our previous study mapping these sequencing data to an older version of the  
277 wheat genome [31]. Full details of expression data and statistical tests for each pairwise  
278 comparison in LD photoperiods are provided in Additional File 3.

279 In Figure 4, we divided genes into mutually exclusive classes according to the conditions under  
280 which they were differentially expressed between wild-type and mutant alleles (i.e. regulated by  
281 *PHYB* or *PHYC* under either SD or LD conditions). For clarity, this figure excludes some  
282 pairwise comparisons with low numbers of genes, so the numbers presented in the text do not  
283 sum to the complete number of DE genes, which are presented in Additional File 4. In both  
284 photoperiods, a greater number of genes were regulated only by *PHYB* than only by *PHYC*  
285 (Figure 4). In SDs, 9.6-fold more genes were specifically regulated by *PHYB* (5,369 genes) than  
286 *PHYC* (561 genes), whereas in LDs, 13.5-fold more genes were specifically regulated by *PHYB*  
287 (2,289 genes) than by *PHYC* (167 genes, Figure 4).

288 There were more genes differentially expressed between WT and mutant genotypes exclusively  
289 in SD (589 genes) than exclusively in LD (46 genes, Figure 4). In addition, the number of genes  
290 differentially regulated in a single photoperiod was larger than the number of genes differentially  
291 regulated in both photoperiods. For example, there were 1,015 genes regulated by *PHYB* in both  
292 SD and LD, compared to 5,369 and 2,289 genes that were significant in either SD or LD  
293 photoperiods, respectively (Figure 4). Since the LD acceleration of heading time in wheat  
294 requires the presence of both *PHYB* and *PHYC*, we focused on genes DE in both mutants. We  
295 detected 589 of these DE genes in SD only, 46 in LD only and 43 in both SD and LD (Figure 4).

296 In the GO term analysis, significantly enriched functional terms associated with the 43 genes  
297 regulated by both phytochromes under SD and LD included ‘transcriptional regulation’ and  
298 ‘photoperiodism’ (Additional file 1, Table S4). The 24 genes positively regulated by  
299 phytochromes (i.e. higher expression in WT than in *phy* mutants) included *FT1*, *FT2*, *FT3*, *PPD-*  
300 *B1*, *VRN1*, *FUL2* and *FUL3* (Figure 5, Additional file 1, Table S5). Although the effects were  
301 greater in LD, these results confirm that *PHYB* and *PHYC* also play a significant role in the  
302 activation of these genes in SD in the Kronos-PI background. These results are consistent with  
303 our qRT-PCR analysis (Figure 3). Other genes with the same expression profile as the previous  
304 group included a gene encoding a *CONSTANS*-like CCT-domain protein  
305 (TraesCS1A01G220300), and two homeologs encoding MYB-transcription factors with high  
306 similarity to *RADIALIS* (TraesCS6A01G273200 and TraesCS6B01G300600, Figure 5,  
307 Additional file 1, Table S5). One gene (TraesCS1A01G569000LC) was upregulated by *PHYB* in  
308 both SD and LD and by *PHYC* in SD, but was downregulated by *PHYC* in LDs (Additional file  
309 4).

310 Among the 17 genes that were negatively regulated by both *PHYB* and *PHYC* in both  
311 photoperiods were TraesCS3B01G365300, which encodes a member of the VQ motif protein  
312 family of transcriptional regulators, and three genes encoding members of the *FLC* clade of  
313 MADS-box TFs (Figure 5, Additional file 1, Table S5). Two of these genes encode homeologs  
314 of *FLC2*, which is orthologous to *OsMADS51*, a SD promoter of flowering in rice [33]. *FLC4*  
315 encodes the ortholog of *ODDSOC2*, which functions as a flowering repressor in *Brachypodium*  
316 and is induced by cold treatment in wheat [34]. Interestingly, TraesCS2A01G427200, which  
317 encodes *WCOR15*, a cold responsive gene, was strongly upregulated in both mutant lines,  
318 suggesting that phytochromes play an important role in suppressing the cold tolerance pathway

319 in wheat under ambient temperature conditions (Figure 5, Additional file 1, Table S5). One gene  
320 (TraesCS2A01G019700LC) was downregulated by *PHYC* in both SD and LD and by *PHYC* in  
321 LD, but was upregulated by *PHYB* in LD conditions (Additional file 4).

322 A GO term analysis of the 589 genes regulated by both *PHYB* and *PHYC* only under SD,  
323 revealed enriched functional terms ‘protein phosphorylation’ and ‘homeostasis’ (Additional file  
324 1, Table S4). Among the 367 genes positively regulated within this group, we detected nine  
325 WRKY transcription factors, both homeologs of a *RADIALIS*-like MYB-family transcription  
326 factor (TraesCS7A01G233300 and TraesCS7B01G131600) and TraesCS5B01G054800, which  
327 encodes a bHLH TF with similarity to the PIF subfamily (Figure 6a, Additional file 1, Table S6).  
328 We also found in this group *FT-A2*, *FT-A4* and *FLC-A1* (Figure 6a, Additional file 1, Table S6).

329 Among the 213 genes that were negatively regulated by both phytochromes only under SD we  
330 identified members of the GATA, G2-like and B-box transcription factor families and  
331 TraesCS1A01G334400, which encodes the GA deactivating enzyme GA-2oxidase-A4 (Figure  
332 6a, Additional file 1, Table S6). The upregulation of four members of the *CBF* family of cold-  
333 activated transcriptional regulators in both phytochrome mutants (Figure 6a, Additional file 1,  
334 Table S6), suggests a similar role to *WCOR15* in suppressing the cold tolerance pathway at  
335 ambient temperatures, but in this case restricted to SD conditions. Nineteen other genes were  
336 either positively regulated by *PHYB* and negatively regulated by *PHYC*, or *vice versa*  
337 (Additional file 4).

338 We next studied the 46 genes regulated by both *PHYB* and *PHYC* specifically under LD  
339 conditions. Among the most significantly enriched functional terms associated with these genes  
340 were ‘shoot system development’, ‘long-day photoperiodism’ and ‘regulation of circadian  
341 rhythm’ (Additional file 1, Table S4). There were 27 genes positively regulated by both *PHYB*



342 and *PHYC* in LD including both homeologs of *GIGANTEA*, suggesting this gene may play a role  
343 in the LD activation of flowering in wheat (Figure 6b, Additional file 1, Table S7). Among the  
344 16 genes negatively regulated by both phytochromes was TraesCS6B01G315400, which encodes  
345 a *CONSTANS*-like protein, a member of the *SPL* family of transcription factors and *TANDEM*  
346 *ZINC FINGER1*, which, in Arabidopsis, interacts with PRR protein components of the circadian  
347 clock regulatory network [35] (Figure 6b, Additional file 1, Table S7). Three other genes were  
348 positively regulated by *PHYB* but negatively regulated by *PHYC* (Additional file 4).

### 349 **Effect of genotype on photoperiod regulated genes**

350 Finally, we performed direct pairwise comparisons between SD and LD samples for each  
351 genotype (Additional file 5) to identify photoperiod-regulated genes (PRGs). There were a  
352 greater number of PRGs in both *phyB*-null (19,749) and *phyC*-null (13,740) mutants than in the  
353 wild-type (12,873, Additional file 1, Figure S4), suggesting that loss-of-function mutations in  
354 *phyB*-null and *phyC*-null were not sufficient to reduce the large effects on the wheat  
355 transcriptome generated by different photoperiods.

356 Although the different sampling points in LD (4 w) and SD (8 w) were selected so that WT  
357 genotypes were at similar developmental stages in both experiments, these results should be  
358 interpreted with caution because the effect of photoperiod is conflated with the effect of  
359 differences in chronological age. Both *phyB*-null and *phyC*-null mutants headed earlier under SD  
360 than under LD, so it is likely that the mutant lines were at different stages of development at the  
361 time of sampling. This particular sampling strategy likely contributed to the smaller number of  
362 PRGs in the WT genotypes relative to the *phyB*-null and *phyC*-null mutants.

363 We used this dataset to explore the expression profiles of 19 flowering time genes in different  
364 genotypes and photoperiods and the interaction between these factors (Figure 7).

365 This analysis confirmed previous results showing that transcript levels of *VRN-A1*, *PPD-B1*, *FT-*  
366 *B1*, *FUL-A2*, *GI*, *CO-B1* and *CO2* are all significantly affected by photoperiod (Figure 7).  
367 Notably, transcript levels of the photoperiod insensitive *Ppd-A1a* allele were not significantly  
368 affected by photoperiod in this dataset, whereas those of the *Ppd-B1b* showed a highly  
369 significant effect of photoperiod ( $P < 0.0001$ ). Transcript levels of *GI* were more highly  
370 expressed in SD, whereas those of *CO1* and *CO2* were more highly expressed in LD (Figure 7).  
371 The expression of most of these flowering time genes was also affected by the *phyB*-null and  
372 *phyC*-null mutations. Significant differences among the three genotypes were accompanied by  
373 significant differences between WT and the combined *phyB*- and *phyC*-null mutants, with the  
374 exception of *CO-A2* and *CO-B2*. The latter result is consistent with a previous study in which  
375 *CO1* was highly upregulated during the day in *phyC*-null mutants but *CO2* transcript levels were  
376 unaffected [28]. The *VRN1* paralogs (*FUL2* and *FUL3*) and the florigen-related genes  
377 (*FT1* and *FT2*) all share similar profiles, with higher transcript levels in the WT relative to  
378 the *phy*-null mutants and in LD relative to SD (Figure 7). *FT-A3* transcripts were not detected,  
379 whereas *FT-B3* transcript levels were higher in SD than in LD, consistent with the known role of  
380 this gene as a SD promoter of heading date [19, 36].  
381 *VRN-A1*, *PPD-B1* and both homeologs of *GIGANTEA* were the only analyzed flowering  
382 promoting genes for which we observed significantly higher transcript levels in the *phy*-null  
383 mutants in SD than in LD. Based on this result, we speculate that these genes could contribute to  
384 the earlier flowering of the *phy*-null mutants in SD than in LD. Expression of these genes was  
385 significantly affected by photoperiod and genotype and all three showed significant genotype x  
386 photoperiod interactions (Figure 7). It is important to point out that the SD RNA-seq samples for  
387 the *phy*-null mutants were collected 70-78 days before heading, so they likely represent early

388 stages of flowering induction. It would be interesting to study later time points closer to heading  
389 to see if genes that are induced by *VRN-A1*, such as *VRN-B1*, *FT1*, and *FT2* [32, 37], are  
390 upregulated earlier in SD than in LD.

### 391 **Light signaling and alternative splicing (AS) in wheat**

392 In addition to the differences in transcript levels, we explored whether *PHYB* or *PHYC* regulate  
393 AS events in wheat using the replicate Multivariate Analysis of Transcript Splicing (rMATS)  
394 statistical method [38]. Our RNA-seq datasets show that both *PHYB* and *PHYC* regulate the  
395 expression of genes encoding components of the splicing machinery (Additional file 1, Table  
396 S8). For example, TraesCS2A01G122400, which encodes the large subunit of splicing factor  
397 U2AF, was downregulated in *phyB*-null mutants in both SD and LD conditions and  
398 TraesCS1B01G130200, which encodes an Arginine/serine-rich splicing factor, was upregulated  
399 in *phyC*-null mutants in both SD and LD (Additional file 1, Table S8). There were also several  
400 splicing-related genes regulated specifically under SD conditions. Three genes encoding splicing  
401 factor subunits were upregulated in both *phyB*-null and *phyC*-null mutants, while  
402 TraesCS1B01G125800, which encodes pre-mRNA-splicing factor *cwc26*, was significantly  
403 downregulated in both mutants in SD conditions (Additional file 1, Table S8).

404 To quantify the effect of these changes on AS in wheat, we first identified RNA-seq reads  
405 mapping to exon-intron junctions in annotated genes and calculated the frequency of AS events  
406 in five different categories (retained intron, skipped exon, alternative 5' or 3' splice sites and  
407 mutually exclusive exons). Comparing the frequency of each event between WT and mutant  
408 genotypes in different photoperiods, we found 5,175 AS events that were significantly regulated  
409 by either *PHYB* or *PHYC* (FDR  $P$ -adj < 0.05). The most commonly observed AS event was  
410 intron retention, followed by alternative 3' splice sites (Figure 8a).

411 To classify the events with potentially greater impact on gene function, we looked at the subset  
412 annotated genes that showed >30% variation in their isoform expression levels between  
413 genotypes. Among these genes, similar numbers were impacted by AS events in SD and LD  
414 (Figure 8b), although we found a slightly larger number of genes with retained intron events  
415 mediated by *PHYC* in LD conditions (Figure 8b). The total number of genes affected by at least  
416 one AS event with >30% variation in frequency between genotypes ranged from 202 (189 AS  
417 only +13 AS & DE) in WT vs *phyC*-null in SD conditions to 279 (275 AS only + 4 AS & DE)  
418 between the same genotypes in LD conditions (Figure 8c). These results indicate that in all  
419 pairwise comparisons the proportion of genes showing AS was much lower than the proportion  
420 of DE genes, and that only a small proportion of genes are both differentially expressed and  
421 subject to AS (Figure 8c).

422 Among all genes subject to AS, the functional term ‘RNA processing’ was significantly enriched  
423 in the GO term analysis as was ‘etioplast organization’ suggesting that some genes impacted by  
424 AS by phytochromes may be involved in chloroplast function (Additional file 1, Table S9). Full  
425 information of the individual genes impacted by different AS events are provided in Additional  
426 file 6. Specific examples include TraesCS2B01G140300, which encodes a CONSTANS-like  
427 protein. A retained intron event in this gene was significantly more abundant in WT plants than  
428 in *phyC*-null mutants in LDs. We detected a retained intron event in *FT-A10* in LD regulated by  
429 both *PHYB* and *PHYC*, and differentially expressed intron retention events in four different  
430 MADS-box genes in different pairwise comparisons (*TaFLC-A2*, *TaFLC-A5*, *TaSOCI-A5* and  
431 *TaAGL12-B1*).

432

433 **Discussion**

#### 434 **Phytochromes interact with *PPD1* in the regulation of wheat heading time**

435 Across plant species, one well-characterized function of phytochromes is to regulate flowering  
436 time in response to changes in photoperiod. Previous studies have shown that Kronos *phyB*-null  
437 and *phyC*-null mutant plants grown under LD headed much later than the wild-type [28-30], and  
438 those results were confirmed here (Figure 1a-b). By contrast, loss-of-function mutations in the  
439 orthologous *PHY* genes in the SD grasses rice and sorghum result in earlier heading under LD  
440 [39-42]. Despite the opposite effect of the *phyB*-null and *phyC*-null mutants on heading time in  
441 SD- and LD-grasses, these two genes promote the expression of *PPD1/PRR37* in both groups of  
442 grasses. The difference between them seems to appear downstream of *PHYB* and *PHYC*, since  
443 under LD conditions *PPD1/PRR37* functions as a flowering repressor in rice [12] and sorghum  
444 [13] but as a flowering promoter in the temperate grasses [9-11].

445 One unexpected result from our study was that both *phyB*-null and *phyC*-null mutants headed  
446 earlier in SD than in LD, suggesting that these plants were behaving as if they were SD-plants. It  
447 is important to note that these experiments were all performed in the variety ‘Kronos’ which  
448 carries the PI (*Ppd-A1a*) allele. This *PPD1* allele has a deletion in its promoter region that  
449 encompass the binding site of the ELF3 protein repressor [5], resulting in ectopic expression of  
450 *PPD1* during the night [14], which is critical for the photoperiodic response as demonstrated in  
451 night-break experiments. Induction of *PPD1* in the middle of a 16 h night (SD) by a 15 m pulse  
452 of light accelerates heading time almost as much as a LD photoperiod [4]. In *Brachypodium*, it  
453 has been proposed that *PHYC* activation of *PPD1* is mediated by ELF3 [5], so the elimination of  
454 an ELF3 binding site in the *Ppd-A1a* allele in wheat may limit the transmission of the  
455 phytochrome signal to *PPD1*. This may explain the reduced differences between SD and LD  
456 observed in the *phyC*-null mutant compared to the WT (Figure 1a-b). It will be important to

457 determine the effects of *phyB*-null and *phyC*-null mutations on heading date in the presence of  
458 the PS *Ppd-A1b* allele to test if the presence of the *Ppd-A1a* allele is necessary for the  
459 accelerated heading time in SD than in LD observed in the *phy* mutants. We have initiated the  
460 crosses to perform this experiment.

461 Although we still do not know the mechanism by which heading date is accelerated in SD  
462 relative to LD in the *phy*-null mutants, the expression studies provide some clues and point to a  
463 role of *PPDI*. This gene, together with its downstream target *VRNI*, both show a significant  
464 interaction between photoperiod and genotype, so that transcript levels are higher in LD in the  
465 WT, but higher in SD in both the *phyB*-null and *phyC*-null mutants (Figure 7). This result  
466 suggests that the modulation of *PPDI* expression and the differential regulation of *VRNI* may be  
467 part of the mechanism that promotes early flowering in SD in the *phy*-null mutants.

468 The acceleration of heading time under SD in the *phy*-null mutants has some similarities with  
469 SD-vernalization, but also some differences. In PS accessions of winter wheat  
470 and *Brachypodium*, an exposure to SD for 6-8 w at room temperature followed by LD replaces  
471 the need for vernalization to accelerate heading date [43-46], but this was not observed in PI  
472 wheat accessions [45]. By contrast, we observed SD acceleration in the Kronos-PI background in  
473 the presence of *phyB*-null or *phyC*-null mutations, which suggests that different regulatory  
474 mechanisms are likely involved in these two phenomena.

475 The temporal reversion in the order of activation of the *FT1* and *FT2* genes in the WT and *phy*  
476 mutants may also contribute to the earlier flowering of the *phy*-null mutants in SD. In the  
477 presence of the wild type phytochrome alleles, *FT1* is expressed to higher levels in Kronos-PI  
478 earlier in development than the *FT2* gene in SD (Figure 3) and LD [32]. However, in the *phyC*-  
479 null mutant under SD, *FT2* transcripts were upregulated earlier than *FT1*. By 17 weeks, when

480 these plants were starting to head, *FT2* reached very high expression levels (>10-fold *ACTIN*) in  
481 both the *phyB*-null and *phyC*-null mutants. In growth chamber experiments under LD, under SD  
482 followed by LD conditions and in fall-planted field experiments, *ft2*-null alleles conferred only a  
483 small delay in heading date [32]. However, the role of *FT2* in the regulation of heading time  
484 under SD in a *phy*-null background requires additional studies.

485 Although *FT3* transcript levels were lower than other assayed genes, they were also upregulated  
486 earlier than *FT1* in both *phyB*-null and *phyC*-null mutants (Figure 3). In barley, overexpression  
487 of the orthologue *HvFT3* accelerates heading in LDs and promotes the transition of the shoot  
488 apical meristem from the vegetative to the reproductive stage in both SD and LD [47]. In  
489 *Brachypodium*, *BdFTL9*, a member of the *FT3* clade promotes flowering in SD conditions [46].  
490 This protein forms a floral activation complex only in the absence of *BdFT1* (i.e. SD conditions),  
491 describing a possible mechanism by which diversity in the PEBP family can finely tune  
492 flowering time control according to photoperiod [48]. We identified several other members of  
493 the PEBP family that were upregulated in LD conditions (Additional file 5), for which it would  
494 be interesting to characterize their role in wheat heading date.

495 In addition to the PEBP genes, *GIGANTEA*, *VRN2/GHD7* and *CO* have been shown to play  
496 important roles in the photoperiod response in rice [49, 50]. *GIGANTEA* is a direct promoter of  
497 FT in Arabidopsis [51], and in rice *GIGANTEA* upregulates *CO* (Hd1) which activates the  
498 expression of *FT* [50, 52]. In this study, we show that wheat *GIGANTEA* was expressed at  
499 significantly higher levels under SD than under LD and was positively regulated by both *PHYB*  
500 and *PHYC* specifically under LD (Figure 7), suggesting that *GIGANTEA* may also play a role in  
501 the wheat photoperiod pathway. In rice, *CO* promotes flowering in SD in the presence of  
502 functional *GHD7/VRN2* or *PRR37/PPD1* alleles, and in LD in the *ghd7prp37* double mutant [49]



503 providing an example of how mutations in these photoperiod genes can result in the reversion of  
504 the photoperiodic response. Both wheat *CO1* homeologs were highly upregulated in both *phy*  
505 mutants, whereas the *CO2* homeologs were not affected by the same mutations suggesting that  
506 these two paralogs are regulated differently by the phytochrome genes. Interestingly, *CO1*  
507 transcript levels were higher in SD in the WT and in LD in the *phy* mutants resulting in a strong  
508 interaction between genotype and photoperiod (Figure 7). We also identified  
509 TraesCS7A01G211300, that encodes the ortholog to *BdCONSTANS-Like 1* (Additional file 6).  
510 This gene is upregulated in LD in WT genotypes, but upregulated in SD in *phyB*-null and *phyC*-  
511 null mutants. Interestingly this gene was differentially expressed in the *Brachypodium elf3*-null  
512 mutant, suggesting that the TraesCS7A01G211300 and *BdCONSTANS-Like 1* orthologs may  
513 share similar regulatory mechanisms [5].

514 We are unable to draw conclusions on the role of the *VRN2* locus (duplicated genes *ZCCT1* and  
515 *ZCCT2*) because the functional *ZCCT-B2a* and *ZCCT-B2b* genes are not annotated in the  
516 reference genome used in our study, and the non-functional *ZCCT-A1* (TraesCS5A01G541300)  
517 and *ZCCT-A2* genes (TraesCS5A01G541200) were expressed at low levels (Additional file 5).

518 When analyzing the expression profiles of flowering time genes it is important to remember that  
519 the RNA-seq data represent a single time point during the day and during plant development of a  
520 very dynamic process of interactions among multiple flowering genes. Therefore, these  
521 expression profiles can change if analyzed at different times or developmental stages. Despite  
522 this limitation, the information generated for this single time point provided important insights  
523 on the complex networks that regulate wheat development in response to the phytochrome  
524 signals.

525



## 526 **Phytochromes affect plant architecture and vegetative development**

527 In addition to flowering time, we found that mutations in *PHYB* and *PHYC* are associated with  
528 differences in vegetative development. In both SD and LD photoperiods, the leaves in the *phyB*-  
529 null and *phyC*-null mutants were longer and wider than in the wild-type suggesting a more  
530 extended or more robust growth (Figure 1e-f, [28, 31]). This is in contrast to the *phyC*-null  
531 mutant phenotype in *Brachypodium*. The first four leaves of *phyC*-null plants were shorter than  
532 WT in SDs, and not significantly different in length in LD conditions [30]. This discrepancy  
533 could be due to the stage of development, since in our study, we measured flag leaves and in  
534 *Brachypodium*, young leaves were studied.

535 The impact of these alleles on plant height was strikingly different between photoperiods.  
536 Whereas under LD conditions both *phyB*-null and *phyC*-null mutant lines were shorter than WT  
537 [31], in SDs both mutants were significantly taller (Figure 1g). Interestingly, although overall  
538 height of *phyB* and *phyC* were similar, the stem development in each mutant was different, with  
539 *phyB*-null mutants exhibiting a greater number of internodes (Figure 1g). There were several  
540 genes regulated by *PHYB* but not *PHYC* that may be associated with these phenotypic  
541 differences. In both SD and LD, transcript levels of *GA20ox-B2* and *GA20ox-B4*, which encode  
542 GA biosynthetic enzymes, were significantly higher in *phyB*-null mutants than either WT or  
543 *phyC*-null (Additional file 4).

544 Mutations in the phytochrome genes also affect plant morphology in the short-day grasses.  
545 Among rice plants grown in the field under non-inductive LD conditions, those with no  
546 functional phytochromes headed earlier, were shorter and had smaller panicles than sister lines  
547 with a functional *PHYC* in a *phyA phyB* background [41]. In the *phyA phyB* background, the  
548 *PhyC* gene also affected chlorophyll content, leaf angle and grain size, confirming the multiple

549 pleiotropic effects of the phytochrome mutants in grasses. Sorghum plants carrying non-  
550 functional *phyB* alleles exhibit elongated hypocotyl growth in response to blue light [53] and  
551 increased stem elongation and internode number in inductive photoperiods [54]. Similarly,  
552 Arabidopsis, a LD-plant, exhibits elongated petioles in *phyB* mutants [55]. These vegetative  
553 phenotypes are characteristic of the shade avoidance response, which is mediated by *PHYB* in  
554 both SD and LD species. The similarities in phenotypes suggest that *PHYB* may play a role in  
555 shade avoidance pathways in wheat that is conserved in the other plant species described above.  
556 Some of the multiple genes differentially regulated in *PHYB* but not in *PHYC* may play a role in  
557 the shade avoidance response.

558 Our transcriptomic results are also consistent with previous studies that have established a link  
559 between phytochromes and the cold regulation pathway [56, 57]. In rice, *phyB*-null mutants  
560 exhibit improved cold tolerance [58] and in Arabidopsis, PIF3 binds to the promoters of *CBF*  
561 genes to suppress their expression [59]. We identified four *CBF* genes and two *COR* genes that  
562 were highly expressed in phytochrome null mutants in SDs (Figures 5 and 6). Transcript levels  
563 of four *COR* genes were significantly higher in SD than LD in WT and both *phy* mutants, but the  
564 differences were greater in the *phy* mutants. This demonstrates that in warm ambient  
565 temperatures, both *PHYB* and *PHYC* act to suppress the activation of the cold responsive  
566 pathway during the day. In wheat, a link between light quality and cold tolerance has previously  
567 been made [60] and suggests that the destabilization of phytochromes in response to FR light  
568 (commonly at higher levels in the dusk) or darkness improves the overall cold tolerance. It would  
569 be interesting to test the cold tolerance of the Kronos phytochrome mutants to confirm this  
570 activation at the physiological level.

571 **Conclusions:** In wheat, *PHYB* and *PHYC* regulate vegetative development and flowering time  
572 with null-mutants for each gene showing a stronger delay in heading time under LD than under  
573 SD. We found that the flowering promoting genes *PPD-B1*, *VRN-A1* and *GIGANTEA* were more  
574 highly expressed in SD than LD in the *phy* mutants, and hypothesize that they may contribute to  
575 the earlier flowering time of these plants in SD than in LD. Our study provides insights into  
576 wheat light signaling pathways in inductive and non-inductive photoperiods and identifies a set  
577 of novel candidate genes to dissect the underlying developmental regulatory networks.

578

## 579 **Methods**

### 580 *Plant materials, growth conditions and phenotypic measurements*

581 All experiments were performed in the tetraploid *Triticum turgidum* L. *ssp.* durum Desf. variety  
582 ‘Kronos’ (genomes AABB). The *phyB-null* and *phyC-null* mutants were identified from EMS-  
583 mutagenized TILLING populations [61] and were described previously [28, 31]. Briefly, we  
584 combined null mutations in the A and B homeologs of each gene by marker assisted selection  
585 and performed two backcrosses to reduce background mutations. We self-pollinated the mutants  
586 for several generations, and used BC<sub>2</sub>F<sub>4</sub> *phyB*-null and BC<sub>2</sub>F<sub>5</sub> *phyC*-null mutants for the RNA-  
587 seq studies. Wild-type lines correspond to the same Kronos parent used in the backcross. All  
588 plants in this experiment carried the *Ppd-A1a* allele that confers reduced sensitivity to  
589 photoperiod [11]. All plants were grown in growth chambers (PGR15, Conviron, Manitoba,  
590 Canada) under SD conditions (8 h light/16 h dark) at 20 °C day/18 °C night temperatures and a  
591 light intensity of ~260 μM m<sup>-2</sup> s<sup>-1</sup>. All chambers used similar halide light configurations and  
592 were located in the same room.

593 Heading time was recorded as the number of days after sowing when half of the spike emerged  
594 from the boot (Zadoks 55 [62]) using five biological replications (n) per genotype. At maturity  
595 we measured total height and individual internode length (n=4), total tiller number, leaf number,  
596 flag leaf width and length (n=6). We compared SD data for heading time with previously  
597 published heading data of the same mutants grown in the same growth chamber configuration  
598 under LD [31].

599

#### 600 *qRT-PCR assays*

601 Beginning when plants were two-weeks old, we collected tissue from the last fully expanded leaf  
602 in liquid nitrogen at three-week intervals until 17 weeks after sowing to cover most of the  
603 developmental stages in the mutants. We collected four biological replicates of all three  
604 genotypes (wild-type, *phyB*-null and *phyC*-null) at each time point. We extracted RNA using the  
605 Spectrum™ Plant Total RNA kit (Sigma-Aldrich, St. Louis, MO) following the manufacturer's  
606 instructions. cDNAs were synthesized from 1 µg of total RNA using the High Capacity Reverse  
607 Transcription Kit (Applied Biosystems) and quantitative RT-PCR was performed in a 7500 Fast  
608 Real-Time PCR system (Applied Biosystems, Foster City, CA) using SYBR Green. Primers for  
609 the target genes *PPD1* [28], *FT1* [15], *FT2* [16], *FT-A3*, *FT-B3* [63], *VRN1* [15], and the control  
610 gene *ACTIN* [31] were described previously. Expression data are presented as fold-*ACTIN* levels  
611 (molecules of target gene/molecules of *ACTIN*).

612

#### 613 *RNA-seq library construction and sequencing*

614 The individual plants used for the RNA-seq experiment were the same plants used for the qRT-  
615 PCR and phenotypic studies. For the SD RNA-seq experiment, we extracted RNA samples from  
616 eight-week-old plants. At this stage, the apices of the wild-type plants were at an early stage of  
617 spike development (Waddington stage 3 [64]) and the apices of both *phyB*-null and *phyC*-null  
618 plants were still in the vegetative stage (Waddington stage 1 [64]). Data from the LD RNA-seq  
619 experiment was previously described [31] and was generated from RNA extracted from the  
620 fully-extended third leaf of four-week-old plants, when the apices of wild-type plants were at the  
621 same developmental stage as in eight-week-old SD-plants. We assembled RNA-sequencing  
622 libraries using the TruSeq RNA Sample Preparation kit v2 (Illumina, San Diego, CA), according  
623 to the manufacturer's instructions. Library quality was determined using a high-sensitivity DNA  
624 chip run on a 2100 Bioanalyzer (Agilent Technologies, Santa Clara, CA). Libraries were  
625 barcoded to allow multiplexing and were sequenced using the 100 bp single read module across  
626 two lanes (two biological replicates of each genotype (= six libraries) per lane on a HiSeq4000  
627 sequencer at the UC Davis Genome Center.

628

### 629 *RNA-seq data processing*

630 Raw reads were processed using a pipeline incorporating "*Scythe*" (<https://github.com/vsbuffalo>)  
631 to remove Illumina adapter contamination (default options) and "*Sickle*"  
632 (<https://github.com/najoshi/sickle>) to remove low-quality reads (With options -t sanger -q 25 -l  
633 50). Processed reads were mapped to the IWGSC RefSeq v1.0 genome assembly [65], using  
634 GSNAPI [66]. We used parameters -m 4 -n 1 -A sam -N 1 -t 24 for the 100 bp single end read  
635 SD data, and parameters -m 2 -n 1 -A sam -N 1 -t 24 for the 50 bp single end read LD data, to  
636 generate Sequence Alignment/Map (SAM) files for each sample. We used high and low

637 confidence gene models from IWGSC Refseq v1.0 gene models. To provide additional context  
638 to gene function, we performed a BLASTP search using each annotated gene as a query against  
639 the NCBI NR database of proteins. We also added additional annotation information for genes  
640 encoding members of different transcription factor families [67], MIKC subclass members of the  
641 MADS-box gene family [68] and of the *FT-like* gene family [63]. Full information of the  
642 annotations associated with each differentially expressed gene are provided in Additional file 2.  
643 Raw count values were generated using htseq-count (<https://github.com/simon-anders/htseq>) on  
644 each of the resulting SAM files, using the options -m union --stranded=no -a 40 -t gene -i ID.  
645 These mapping parameters ensured that reads with an alignment quality lower than 40 were  
646 discarded, so that only counts from uniquely mapped reads were considered for gene expression  
647 analyses. Genes that showed no raw count values greater than or equal to three in any replicate of  
648 any of the three genotypes were discarded, leaving 72,108 genes with a level of expression above  
649 our threshold. The raw counts for these remaining genes were normalized using DESeq2. After  
650 normalization, we applied the statistical tests implemented in both DESeq2 and edgeR to classify  
651 differentially expressed genes in pairwise comparisons. The P-values generated by both analyses  
652 were adjusted for FDR, using the procedure of Benjamini and Hochberg [69] and we selected a  
653 stringent cutoff of adjusted  $P \leq 0.01$  for significance for both tests within each experimental  
654 replication. For LD data, two experimental replicates were analyzed separately and only genes  
655 that were significant in both comparisons (described as “high-confidence” DE genes in our  
656 earlier study), were included in this analysis.

657

658 *Alternative splicing*

659 Alternative splicing events were characterized with rMATS v4.0.1 [38]. A GTF annotation file  
660 was created for both SD and LD datasets using Stringtie [70]. Inputs for this file were the sorted  
661 BAM files generated during RNA-seq mapping and high and low confidence gene annotations  
662 from IWGSC RefSeq v1.1 to specify exon-intron boundaries. Genome indices used by rMATS  
663 were created from the IWGSC RefSeq v1.0 assembly using STAR (parameter --runMode  
664 genomeGenerate) [71]. Fastq files for each sample were trimmed to 100bp and 50bp for SD and  
665 LD datasets, respectively, using a custom perl script. rMATS was run twice on each dataset,  
666 comparing WT with *phyB*-null and WT with *phyC*-null samples in both SD and LD datasets,  
667 using their respective GTF annotation files [65]. The inclusion level difference for each  
668 alternative splicing event was calculated from the number of reads for each replicate that map to  
669 a possible inclusion event, normalized by the length of those possible events. The value for each  
670 type of event represents the pairwise comparisons of the mean value from four replicates of wild-  
671 type and the respective *phy*-null genotype. Positive inclusion level differences indicate more  
672 reads mapped to an AS event in wild type than in the *phy*-null sample and vice versa. An initial  
673 0.01% splicing difference and FDR < 0.05 filter was used to determine significant alternative  
674 splicing events categorized into retained introns, skipped exons, alternative 5' splice sites,  
675 alternative 3' splice sites, and mutually exclusive exons. A more stringent cutoff of 30%  
676 inclusion level difference was used to analyze a subset of these events in greater detail.

677

### 678 *Functional annotation*

679 We identified the longest transcribed contig mapping to each genomic locus and performed a  
680 BLASTX against the nr protein database (nr.28, Apr 24, 2015 release, NCBI) and a BLASTP  
681 using the translated ORF against the Pfam database version 27.0 with InterProScan version 5.13

682 to identify conserved protein domains. The output was used to infer GO terms associated with  
683 each genomic locus using BLAST2GO version 2.6.5 and we used the ‘R’ package TopGO  
684 version 2.14.0 to perform an enrichment analysis among the differentially regulated gene sets.  
685 “Biological Process” terms were obtained and significance values for enrichment were calculated  
686 using ‘classic’ Fishers’ exact test, as implemented in TopGO.

687

688 **List of abbreviations:**

689 AS, Alternative Splicing; BAM, Binary Alignment Map; bHLH, basic Helix Loop Helix; COR,  
690 Cold Responsive; DE, Differentially Expressed; EMS, Ethyl-Methane Sulfonate; FDR, False  
691 Discovery Rate; FR, Far Red; GO, Gene Ontology; IWGSC, International Wheat Genome  
692 Sequencing Consortium; LD, Long Day; MDS, Multi-Dimensional Scaling; PEBP,  
693 Phosphatidylethanolamine-Binding Proteins; PHY, Phytochrome; PIF, Phytochrome Interacting  
694 Factor; PRG, Photoperiod Regulated Gene; PRR, Pseudo-Response Regulator; PI, Photoperiod  
695 Insensitive; PS, Photoperiod Sensitive; qRT-PCR, quantitative Reverse Transcriptase  
696 Polymerase Chain Reaction; R, Red; rMATS, replicate Multivariate Analysis of Transcript  
697 Splicing; SAM, Sequence Alignment Map; SEM, Standard Error of the Mean; TILLING,  
698 Targeted Induced Local Lesions IN Genomes; TPM, Transcripts per Million; WT, Wild-type.

699

700 **Declarations:**

701 *Availability of data and materials*

702 RNA-seq reads and raw count data is available at NCBI GEO

703 (<https://www.ncbi.nlm.nih.gov/geo/>) under the accession number GSE141000. Previously



704 published raw data from RNA-seq studies is available under accession number GSE79049.

705 Genetic materials from this study are available by request.

706

707 *Competing interests:*

708 The authors declare that they have no competing interests.

709

710 *Funding:*

711 JD acknowledges financial support from the Howard Hughes Medical Institute and from

712 Agriculture and Food Research Initiative Competitive Grant 2017-67007-25939 (WheatCAP)

713 from the USDA National Institute of Food and Agriculture. HB and AA acknowledge funding

714 from TUBITAK grant. AA is supported by Tubitak-BİDEB scholarship.

715

716 *Author contributions:*

717 NK developed plant materials, performed all phenotypic analyses and molecular experiments,

718 performed data analysis and contributed to writing the manuscript. CVG, JH, AA, HB performed

719 expression data analysis. JD contributed to the initial coordination of the project, to data analyses

720 and to the writing of the manuscript. SP performed data analysis and wrote the manuscript. All

721 authors read and approved the final manuscript.

722 **Figure legends:**

723 **Figure 1:** Phenotypic characterization of *phyB*-null and *phyC*-null mutants under SD conditions

724 (8h light/16h dark). (a) Heading date of wild-type and *phyB*-null plants in SD and LD showing

725 the significant interaction between *PHYB* and photoperiod. **(b)** Heading date of wild-type and  
726 *phyC*-null plants in SD and LD showing the significant interaction between *PHYC* and  
727 photoperiod. **(c)** Tiller number per plant. **(d)** Mean leaf number per tiller. **(e)** Flag leaf length. **(f)**  
728 Flag leaf width. **(g)** Internode length and number. Each bar represents an individual plant and the  
729 horizontal lines correspond to the position of the nodes. Each internode is represented by a  
730 different color, ordered according to their position in the stem. The uppermost segment in each  
731 individual represents the length between the last node and the spike (peduncle) **(h)** Picture of  
732 representative plants when *phyB*-null plants reached heading date. **(c to f)** Boxplots represent  
733 values of at least five biological replications. Different letters indicate significant differences  
734 (Tukey's test  $P < 0.05$ ). For (a) and (b), \* signifies significant differences between photoperiods  
735 for each genotype,  $P < 0.0001$ . The differences between wild-type and mutant alleles were also  
736 highly significant ( $P < 0.0001$ ) for both genes and both photoperiods.

737 **Figure 2:** Transcriptomes of WT, *phyB*-null and *phyC*-null plants under SD photoperiods. **(a)**  
738 Multi-dimensional scaling (MDS) plot showing overall transcriptome profile of four biological  
739 replicates of each genotype. **(b)** Number of differentially expressed genes from pairwise  
740 comparisons between WT and *phyB*-null, WT and *phyC*-null and the subset of genes commonly  
741 regulated by both genes. Note that 27 additional genes were regulated by both *PHYB* and *PHYC*  
742 but in opposite directions and are not included in this graph.

743 **Figure 3:** Transcript levels of flowering time genes in WT, *phyB*-null and *phyC*-null mutants  
744 under SD conditions assayed by qRT-PCR. Each data point represents the mean of four  
745 biological replications and error bars represent SEM. Different letters denote significant  
746 differences between samples at the 0.05 confidence level. All primers used to assay expression  
747 were redundant for A and B homeologs, except for *FT-A3* and *FT-B3*. The WT control headed at

748 14 w, and at 17 w plants showed signs of senescence so were not sampled.

749 **Figure 4:** Summary of differentially expressed genes regulated by *PHYB* and *PHYC* in either SD  
750 or LD photoperiods. Each mutually exclusive category includes genes differentially expressed  
751 between WT and the respective phytochrome mutant in pairwise comparisons. For clarity, not all  
752 pairwise comparisons presented in Additional File 4 are displayed here.

753 **Figure 5:** Heat map of relative expression changes of selected genes within the 43 DE genes  
754 regulated by both *PHYB* and *PHYC* in both SD and LD conditions. Expression values are  
755 presented as log<sub>2</sub> TPM values of the fold-change between WT and each respective *phy* mutant.  
756 Gray color represents zero expression in the *phy* mutant.

757 **Figure 6:** Heat map of relative expression changes of genes regulated by both *PHYB* and *PHYC*  
758 (a) specifically in SDs and (b) specifically in LDs. Expression values are presented as log<sub>2</sub> TPM  
759 values of the fold-change between WT and each respective *phy* mutant. Gray color represents  
760 zero expression in the *phy* mutant.

761 **Figure 7:** Photoperiod x Genotype factorial ANOVAs for transcripts per million (TPM) of 19  
762 flowering time genes. Least square adjusted means of TPM (SD = 4 reps, LD = 8 reps) from the  
763 ANOVA are color coded so that higher transcript levels are indicated in darker shades of green  
764 (separately for each gene). WT *vs.* *phy* indicates an orthogonal contrast comparing the WT  
765 *versus* the two mutants. Data was transformed to provide normality of residuals. \*\*\*\* =  $P <$   
766 0.0001, \*\*\* =  $P <$  0.001, \*\* =  $P <$  0.01, \* =  $P <$  0.05, ns = not significant.

767 <sup>1</sup> Since transformation affects the interpretation of the significance of the interactions, we also  
768 provide the significance of the interaction in the untransformed data.

769 <sup>2</sup> *FT-A3* transcript levels were zero in all samples.

770 **Figure 8:** Phytochrome-mediated alternative splicing events in wheat **(a)** Number of AS events  
771 in each category among all RNA-seq data. **(b)** Number of genes differentially affected by AS  
772 events in WT and *phy*-null mutants in SD and LD RNA-seq experiments. **(c)** Overlap between  
773 DE genes and AS genes in pairwise comparisons between WT and *phy*-null mutants in SD and  
774 LD photoperiods.

775

#### 776 **Additional files**

777 Additional file 1: Figures S1-S4, Tables S1-S9 (.pdf).

778 Additional file 2: RNA-seq data for all samples from SD photoperiods (.xls).

779 Additional file 3: RNA-seq data for all samples from LD photoperiods (.xls).

780 Additional file 4: RNA-seq data and annotations of genes regulated by *PHYB* or *PHYC* under SD  
781 or LD, divided into mutually exclusive categories (.xls).

782 Additional file 5: RNA-seq data comparing SD and LD within genotypes (.xls).

783 Additional file 6: Alternative splicing data from all pairwise comparisons (.xls).

784

#### 785 **Bibliography**

786 1. Andrés F, Coupland G. The genetic basis of flowering responses to seasonal cues. Nat  
787 Rev Genet. 2012;13:627-639.

788 2. Trevaskis B. Developmental pathways are blueprints for designing successful crops.  
789 Front Plant Sci. 2018;9:745.

- 790 3. Distelfeld A, Li C, Dubcovsky J. Regulation of flowering in temperate cereals. *Curr Opin*  
791 *Plant Biol.* 2009;12:178-184.
- 792 4. Pearce S, Shaw LM, Lin H, Cotter JD, Li C, Dubcovsky J. Night-break experiments shed  
793 light on the *Photoperiod1*-mediated flowering. *Plant physiol.* 2017;174:1139-1150.
- 794 5. Gao M, Geng F, Klose C, Staudt A-M, Huang H, Nguyen D, Lan H, Mockler TC,  
795 Nusinow DA, Hiltbrunner A, Schäfer E., Wigge PA, Jaeger KE. Phytochromes measure  
796 photoperiod in *Brachypodium*. *bioRxiv.* 2019;697169.
- 797 6. Klose C, Viczián A, Kircher S, Schäfer E, Nagy F. Molecular mechanisms for mediating  
798 light-dependent nucleo/cytoplasmic partitioning of phytochrome photoreceptors. *New*  
799 *Phytol.* 2015;206:965-971.
- 800 7. Rockwell NC, Su YS, Lagarias JC. Phytochrome structure and signaling mechanisms.  
801 *Annu Rev Plant Biol.* 2006;57:837-858.
- 802 8. Sakamoto K, Nagatani A. Nuclear localization activity of phytochrome B. *Plant J.*  
803 1996;10:859-868.
- 804 9. Beales J, Turner A, Griffiths S, Snape JW, Laurie DA. A pseudo-response regulator is  
805 misexpressed in the photoperiod insensitive *Ppd-D1a* mutant of wheat (*Triticum aestivum*  
806 L.). *Theor Appl Genet.* 2007;115:721-733.
- 807 10. Turner A, Beales J, Faure S, Dunford RP, Laurie DA. The pseudo-response regulator  
808 *Ppd-H1* provides adaptation to photoperiod in barley. *Science.* 2005;310:1031-1034.
- 809 11. Wilhelm EP, Turner AS, Laurie DA. Photoperiod insensitive *Ppd-A1a* mutations in  
810 tetraploid wheat (*Triticum durum* Desf.). *Theor Appl Genet.* 2009;118:285-294.

- 811 12. Koo BH, Yoo SC, Park JW, Kwon CT, Lee BD, An G, Zhang Z, Li J, Li Z, Paek NC.  
812 Natural variation in *OsPRR37* regulates heading date and contributes to rice cultivation at  
813 a wide range of latitudes. *Mol Plant*. 2013;6:1877-1888.
- 814 13. Murphy RL, Klein RR, Morishige DT, Brady JA, Rooney WL, Miller FR, Dugas DV,  
815 Klein PE, Mullet JE. Coincident light and clock regulation of *pseudoresponse regulator*  
816 *protein 37 (PRR37)* controls photoperiodic flowering in sorghum. *Proc Natl Acad Sci*  
817 *USA*. 2011;108:16469-16474.
- 818 14. Shaw LM, Turner AS, Laurie DA. The impact of photoperiod insensitive *Ppd-1a*  
819 mutations on the photoperiod pathway across the three genomes of hexaploid wheat  
820 (*Triticum aestivum*). *Plant J*. 2012;71:71-84.
- 821 15. Yan L, Fu D, Li C, Blechl A, Tranquilli G, Bonafede M, Sanchez A, Valarik M, Yasuda  
822 S, Dubcovsky J. The wheat and barley vernalization gene *VRN3* is an orthologue of *FT*.  
823 *Proc Natl Acad Sci USA*. 2006;103:19581-19586.
- 824 16. Li C, Dubcovsky J. Wheat FT protein regulates *VRN1* transcription through interactions  
825 with FDL2. *Plant J*. 2008;55:543-554.
- 826 17. Li C, Lin H, Chen A, Lau M, Jernstedt J, Dubcovsky J. Wheat *VRN1*, *FUL2* and *FUL3*  
827 play critical and redundant roles in spikelet development and spike determinacy.  
828 *Development*. 2019;146:dev175398.
- 829 18. Li C, Lin H, Dubcovsky J. Factorial combinations of protein interactions generate a  
830 multiplicity of florigen activation complexes in wheat and barley. *Plant J*. 2015;84:70-82.
- 831 19. Lv B, Nitcher R, Han X, Wang S, Ni F, Li K, Pearce S, Wu J, Dubcovsky J, Fu D.  
832 Characterization of *FLOWERING LOCUS T1 (FT1)* gene in *Brachypodium* and wheat.  
833 *PloS One*. 2014;9:e94171.

- 834 20. Leivar P, Quail PH. PIFs: pivotal components in a cellular signaling hub. *Trends Plant*  
835 *Sci.* 2011;16:19-28.
- 836 21. Pham VN, Kathare PK, Huq E. Phytochromes and phytochrome interacting factors. *Plant*  
837 *Physiol.* 2018;176:1025-1038.
- 838 22. Shen Y, Khanna R, Carle CM, Quail PH. Phytochrome induces rapid PIF5  
839 phosphorylation and degradation in response to red-light activation. *Plant Physiol.*  
840 2007;145:1043-1051.
- 841 23. Shikata H, Hanada K, Ushijima T, Nakashima M, Suzuki Y, Matsushita T. Phytochrome  
842 controls alternative splicing to mediate light responses in Arabidopsis. *Proc Natl Acad*  
843 *Sci USA.* 2014;111:18781-18786.
- 844 24. Dong J, Chen H, Deng XW, Irish VF, Wei N. Phytochrome B induces intron retention  
845 and translational inhibition of PHYTOCHROME-INTERACTING FACTOR 3. *Plant*  
846 *Physiol.* 2019;182:159-166.
- 847 25. Lin BY, Shih CJ, Hsieh HY, Chen HC, Tu SL. Phytochrome coordinates with a hnRNP  
848 to regulate alternative splicing via an exonic splicing silencer. *Plant Physiol.* 2020;182:  
849 243–254.
- 850 26. Shikata H, Shibata M, Ushijima T, Nakashima M, Kong SG, Matsuoka K, Lin C,  
851 Matsushita T. The RS domain of Arabidopsis splicing factor RRC1 is required for  
852 phytochrome B signal transduction. *Plant J.* 2012;70:727-738.
- 853 27. Bae G, Choi G. Decoding of light signals by plant phytochromes and their interacting  
854 proteins. *Annu Rev Plant Biol.* 2008;59:281-311.

- 855 28. Chen A, Li C, Hu W, Lau MY, Lin H, Rockwell NC, Martin SS, Jernstedt JA, Lagarias  
856 JC, Dubcovsky J. Phytochrome C plays a major role in the acceleration of wheat  
857 flowering under long-day photoperiod. *Proc Natl Acad Sci USA*. 2014;111:10037-10044.
- 858 29. Nishida H, Ishihara D, Ishii M, Kaneko T, Kawahigashi H, Akashi Y, Saisho D, Tanaka  
859 K, Handa H, Takeda K, Kato K. *Phytochrome C* is a key factor controlling long-day  
860 flowering in barley. *Plant Physiol*. 2013;163:804-814.
- 861 30. Woods DP, Ream TS, Minevich G, Hobert O, Amasino RM. PHYTOCHROME C is an  
862 essential light receptor for photoperiodic flowering in the temperate grass, *Brachypodium*  
863 *distachyon*. *Genetics* 2014;198:397-408.
- 864 31. Pearce S, Kippes N, Chen A, Debernardi JM, Dubcovsky J. RNA-seq studies using wheat  
865 *PHYTOCHROME B* and *PHYTOCHROME C* mutants reveal shared and specific  
866 functions in the regulation of flowering and shade-avoidance pathways. *BMC Plant Biol*.  
867 2016;16:141.
- 868 32. Shaw LM, Lyu B, Turner R, Li C, Chen F, Han X, Fu D, Dubcovsky J. *FLOWERING*  
869 *LOCUS T2* regulates spike development and fertility in temperate cereals. *J Exp Bot*.  
870 2019;70:193-204.
- 871 33. Kim SL, Lee S, Kim HJ, Nam HG, An G. *OsMADS51* is a short-day flowering promoter  
872 that functions upstream of *Ehd1*, *OsMADS14*, and *Hd3a*. *Plant Physiol*. 2007;145:1484-  
873 1494.
- 874 34. Sharma N, Ruelens P, D'Hauw M, Maggen T, Dochy N, Torfs S, Kaufmann K, Rohde A,  
875 Geuten K. A Flowering Locus C homolog is a vernalization-regulated repressor in  
876 *Brachypodium* and is cold regulated in wheat. *Plant Physiol*. 2017;173:1301-1315.



- 877 35. Li B, Wang Y, Zhang Y, Tian W, Chong K, Jang J-C, Wang L. PRR5, 7 and 9 positively  
878 modulate TOR signaling-mediated root cell proliferation by repressing *TANDEM ZINC*  
879 *FINGER 1* in Arabidopsis. *Nucleic Acids Res.* 2019;47:5001-5015.
- 880 36. Faure S, Higgins J, Turner A, Laurie DA. The *FLOWERING LOCUS T*-like gene family  
881 in barley (*Hordeum vulgare*). *Genetics.* 2007;176:599-609.
- 882 37. Loukoianov A, Yan L, Blechl A, Sanchez A, Dubcovsky J. Regulation of *VRN-1*  
883 vernalization genes in normal and transgenic polyploid wheat. *Plant Physiol.*  
884 2005;138:2364-2373.
- 885 38. Shen S, Park JW, Lu ZX, Lin L, Henry MD, Wu YN, Zhou Q, Xing Y. rMATS: robust  
886 and flexible detection of differential alternative splicing from replicate RNA-Seq data.  
887 *Proc Natl Acad Sci USA.* 2014;111:E5593-5601.
- 888 39. Childs KL, Miller FR, Cordonnier-Pratt MM, Pratt LH, Morgan PW, Mullet JE. The  
889 sorghum photoperiod sensitivity gene, *Ma3*, encodes a phytochrome B. *Plant Physiol.*  
890 1997;113:611-619.
- 891 40. Yang S, Murphy RL, Morishige DT, Klein PE, Rooney WL, Mullet JE. Sorghum  
892 phytochrome B inhibits flowering in long days by activating expression of *SbPRR37* and  
893 *SbGHD7*, repressors of *SbEHD1*, *SbCN8* and *SbCN12*. *PLoS One* 2014;9:e105352.
- 894 41. Li Y, Zheng C, Zhang Z, Zhou J, Zhang H, Xie X. Characterization of phytochrome C  
895 functions in the control of de-etiolation and agronomic traits in rice. *Plant Physiol*  
896 *Biochem.* 2019;142:117-124.
- 897 42. Takano M, Inagaki N, Xie X, Yuzurihara N, Hihara F, Ishizuka T, Yano M, Nishimura  
898 M, Miyao A, Hirochika H, Shinomura T. Distinct and cooperative functions of

- 899 phytochromes A, B, and C in the control of deetiolation and flowering in rice. *Plant Cell*.  
900 2005;17:3311-3325.
- 901 43. Dubcovsky J, Loukoianov A, Fu D, Valarik M, Sanchez A, Yan L. Effect of photoperiod  
902 on the regulation of wheat vernalization genes *VRN1* and *VRN2*. *Plant Mol Biol*.  
903 2006;60:469-480.
- 904 44. Evans LT. Short day induction of inflorescence initiation in some winter wheat varieties.  
905 *Aust J Plant Physiol*. 1987;14:277-286.
- 906 45. Turner AS, Faure S, Zhang Y, Laurie DA. The effect of day-neutral mutations in barley  
907 and wheat on the interaction between photoperiod and vernalization. *Theor Appl Genet*.  
908 2013;126:2267-2277.
- 909 46. Woods D, Dong Y, Bouche F, Bednarek R, Rowe M, Ream T, Amasino R. A florigen  
910 paralog is required for short-day vernalization in a pooid grass. *eLife*. 2019;8:e42153.
- 911 47. Mulki MA, Bi X, von Korff M. FLOWERING LOCUS T3 controls spikelet initiation but  
912 not floral development. *Plant Physiol*. 2018;178:1170-1186.
- 913 48. Qin Z, Bai Y, Muhammad S, Wu X, Deng P, Wu J, An H, Wu L. Divergent roles of FT-  
914 like 9 in flowering transition under different day lengths in *Brachypodium distachyon*.  
915 *Nat Comm*. 2019;10:812.
- 916 49. Fujino K, Yamanouchi U, Nonoue Y, Obara M, Yano M. Switching genetic effects of the  
917 flowering time gene *Hd1* in LD conditions by *Ghd7* and *OsPRR37* in rice. *Breed Sci*  
918 2019;69:127-132.
- 919 50. Zhang Z, Hu W, Shen G, Liu H, Hu Y, Zhou X, Liu T, Xing Y. Alternative functions of  
920 *Hd1* in repressing or promoting heading are determined by *Ghd7* status under long-day  
921 conditions. *Sci Rep*. 2017;7:5388.

- 922 51. Sawa M, Kay SA. GIGANTEA directly activates *Flowering Locus T* in *Arabidopsis*  
923 *thaliana*. Proc Natl Acad Sci USA. 2011;108:11698-11703.
- 924 52. Hayama R, Yokoi S, Tamaki S, Yano M, Shimamoto K. Adaptation of photoperiodic  
925 control pathways produces short-day flowering in rice. Nature. 2003;422:719-722.
- 926 53. Childs KL, Cordonnier-Pratt M-M, Pratt LH, Morgan PW. Genetic regulation of  
927 development in *Sorghum bicolor*: VII. *ma<sub>3</sub><sup>R</sup>* flowering mutant lacks a phytochrome that  
928 predominates in green tissue. Plant Phys. 1992;99:765-770.
- 929 54. Morgan PW, Finlayson S. Physiology and genetics of maturity and height. In: Sorghum:  
930 Origin, history, technology, and production. Edited by Smith CW, Frederiksen RA.  
931 Wiley;2000:227-326.
- 932 55. Franklin KA, Quail PH. Phytochrome functions in Arabidopsis development. J Exp Bot.  
933 2010;61:11-24.
- 934 56. Franklin KA, Whitelam GC. Light-quality regulation of freezing tolerance in *Arabidopsis*  
935 *thaliana*. Nat Genet 2007;39:1410-1413.
- 936 57. Lee CM, Thomashow MF. Photoperiodic regulation of the C-repeat binding factor (CBF)  
937 cold acclimation pathway and freezing tolerance in *Arabidopsis thaliana*. Proc Natl Acad  
938 Sci USA. 2012;109:15054-15059.
- 939 58. He Y, Li Y, Cui L, Xie L, Zheng C, Zhou G, Zhou J, Xie X. Phytochrome B negatively  
940 affects cold tolerance by regulating *OsDREB1* gene expression through Phytochrome  
941 Interacting Factor-Like protein OsPIL16 in rice. Front Plant Sci. 2016;7:1963-1963.
- 942 59. Jiang B, Shi Y, Zhang X, Xin X, Qi L, Guo H, Li J, Yang S. PIF3 is a negative regulator  
943 of the *CBF* pathway and freezing tolerance in *Arabidopsis*. Proc Natl Acad Sci USA.  
944 2017; 114:E6695-E6702.

- 945 60. Novák A, Boldizsár A, Ádám E, Kozma-Bognár L, Majláth I, Båga M, Tóth B, Chibbar  
946 R, Galiba G. Light-quality and temperature-dependent *CBF14* gene expression modulates  
947 freezing tolerance in cereals. *J Exp Bot.* 2016;67:1285-1295.
- 948 61. Krasileva KV, Vasquez-Gross HA, Howell T, Bailey P, Paraiso F, Clissold L, Simmonds  
949 J, Ramirez-Gonzalez RH, Wang X, Borrill P, Fosker C, Ayling S, Phillips AL, Uauy C,  
950 Dubcovsky J. Uncovering hidden variation in polyploid wheat. *Proc Natl Acad Sci USA.*  
951 2017;114:E913-E921.
- 952 62. Zadoks JC, Chang TT, Konzak CF. A decimal code for the growth stages of cereals.  
953 *Weed Res.* 1974;14:415-421.
- 954 63. Halliwell J, Borrill P, Gordon A, Kowalczyk R, Pagano ML, Saccomanno B, Bentley  
955 AR, Uauy C, Cockram J. Systematic investigation of *FLOWERING LOCUS T*-like  
956 Poaceae gene families identifies the short-day expressed flowering pathway gene, *TaFT3*  
957 in wheat (*Triticum aestivum* L.). *Front Plant Sci.* 2016;7:857.
- 958 64. Waddington SR, Cartwright PM, Wall PC. A quantitative scale of spike initial and pistil  
959 development in barley and wheat. *Ann Bot.* 1983;51:119-130.
- 960 65. International Wheat Genome Sequencing Consortium (IWGSC). Shifting the limits in  
961 wheat research and breeding using a fully annotated reference genome. *Science.*  
962 2018;361:6403.
- 963 66. Wu TD, Watanabe CK. GMAP: a genomic mapping and alignment program for mRNA  
964 and EST sequences. *Bioinformatics.* 2005;21:1859-1875.
- 965 67. Ramírez-González RH, Borrill P, Lang D, Harrington SA, Brinton J, Venturini L, Davey  
966 M, Jacobs J, van Ex F, Pasha A *et al.* The transcriptional landscape of polyploid wheat.  
967 *Science.* 2018;361:6403.

- 968 68. Schilling S, Kennedy A, Pan S, Jermiin LS, Melzer R. Genome-wide analysis of MIKC-  
969 type MADS-box genes in wheat: pervasive duplications, functional conservation and  
970 putative neofunctionalization. *New Phytol.* 2019;225:511-529.
- 971 69. Benjamini Y, Hochberg Y. Controlling the false discovery rate: a practical and powerful  
972 approach to multiple testing. *J R Stat Soc Series B Stat Methodol.* 1995;57:289-300.
- 973 70. Pertea M, Pertea GM, Antonescu CM, Chang TC, Mendell JT, Salzberg SL. StringTie  
974 enables improved reconstruction of a transcriptome from RNA-seq reads. *Nat Biotech.*  
975 2015;33:290-295.
- 976 71. Dobin A, Davis CA, Schlesinger F, Drenkow J, Zaleski C, Jha S, Batut P, Chaisson M,  
977 Gingeras TR. STAR: ultrafast universal RNA-seq aligner. *Bioinformatics.* 2013;29:15-  
978 21.

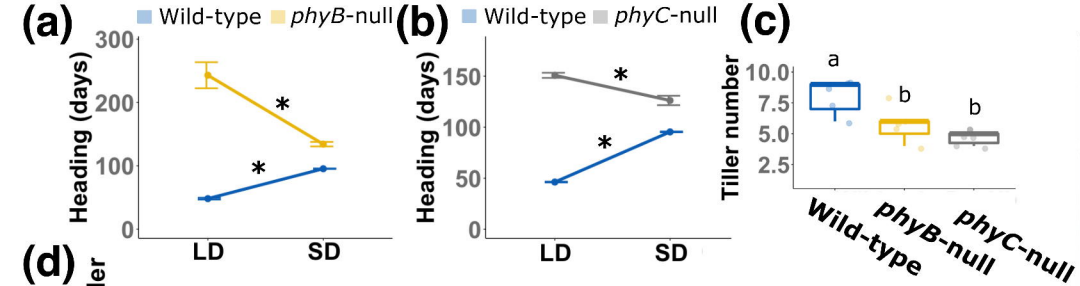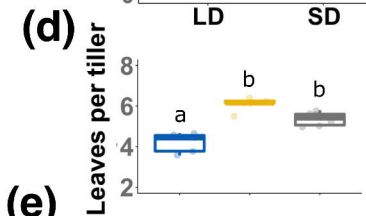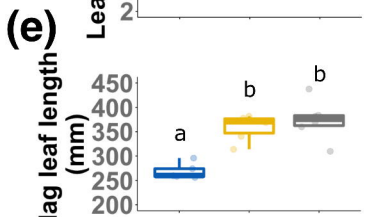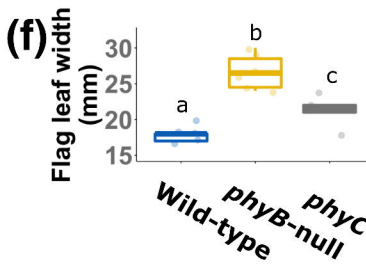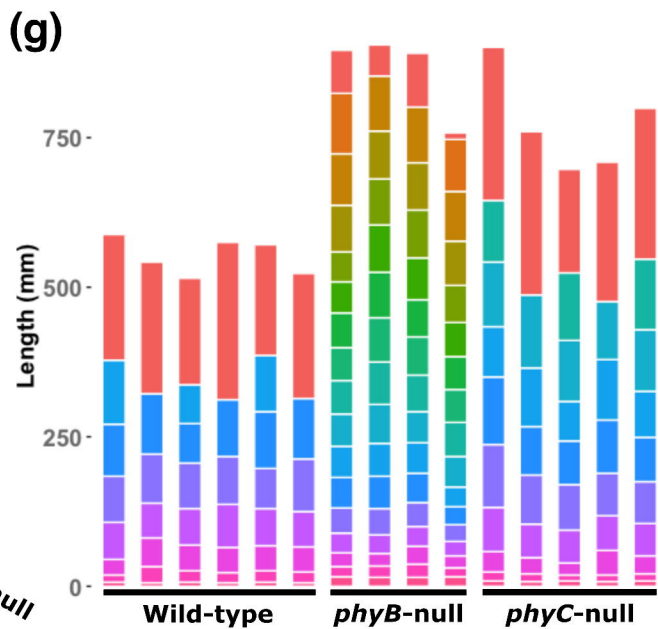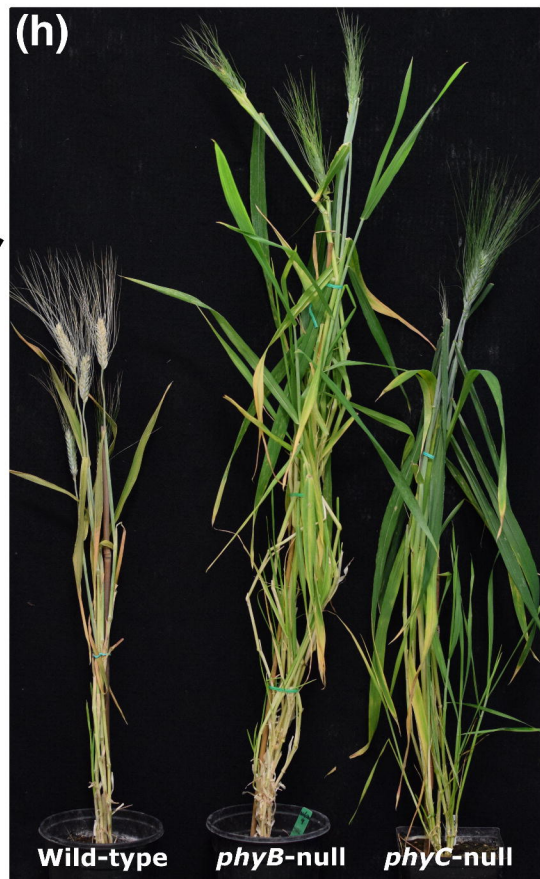

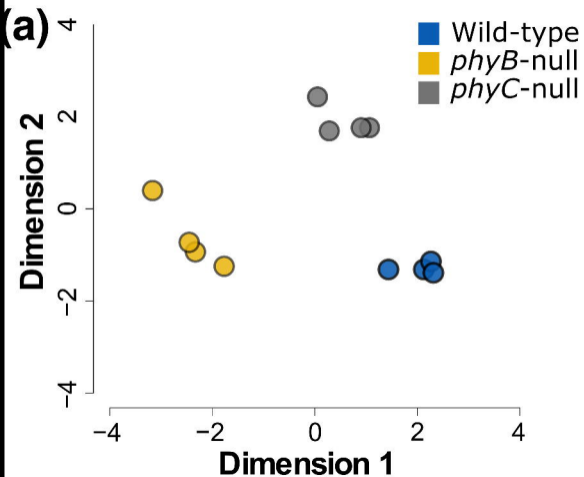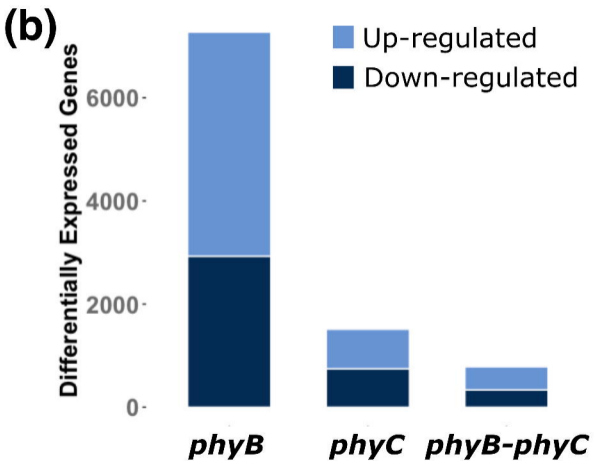



### PPD1

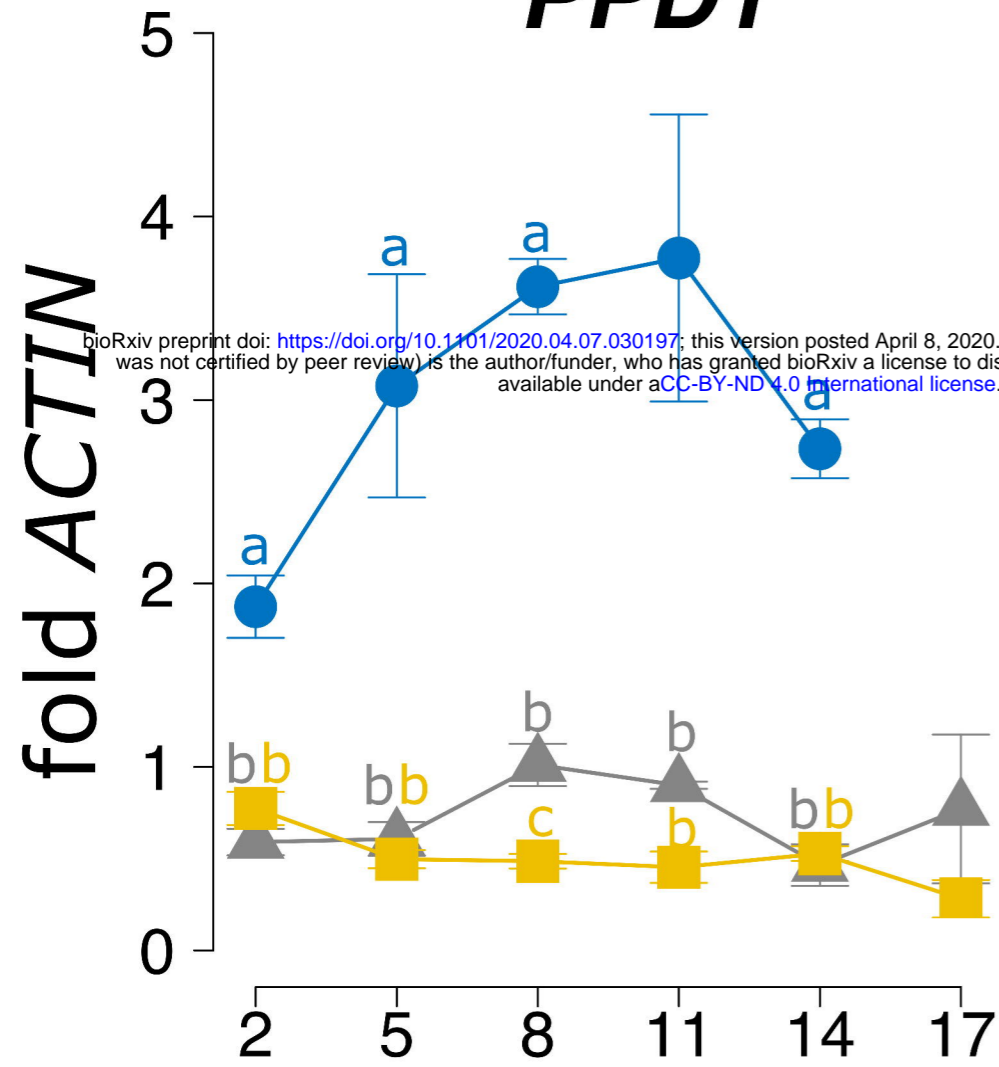

### FT1

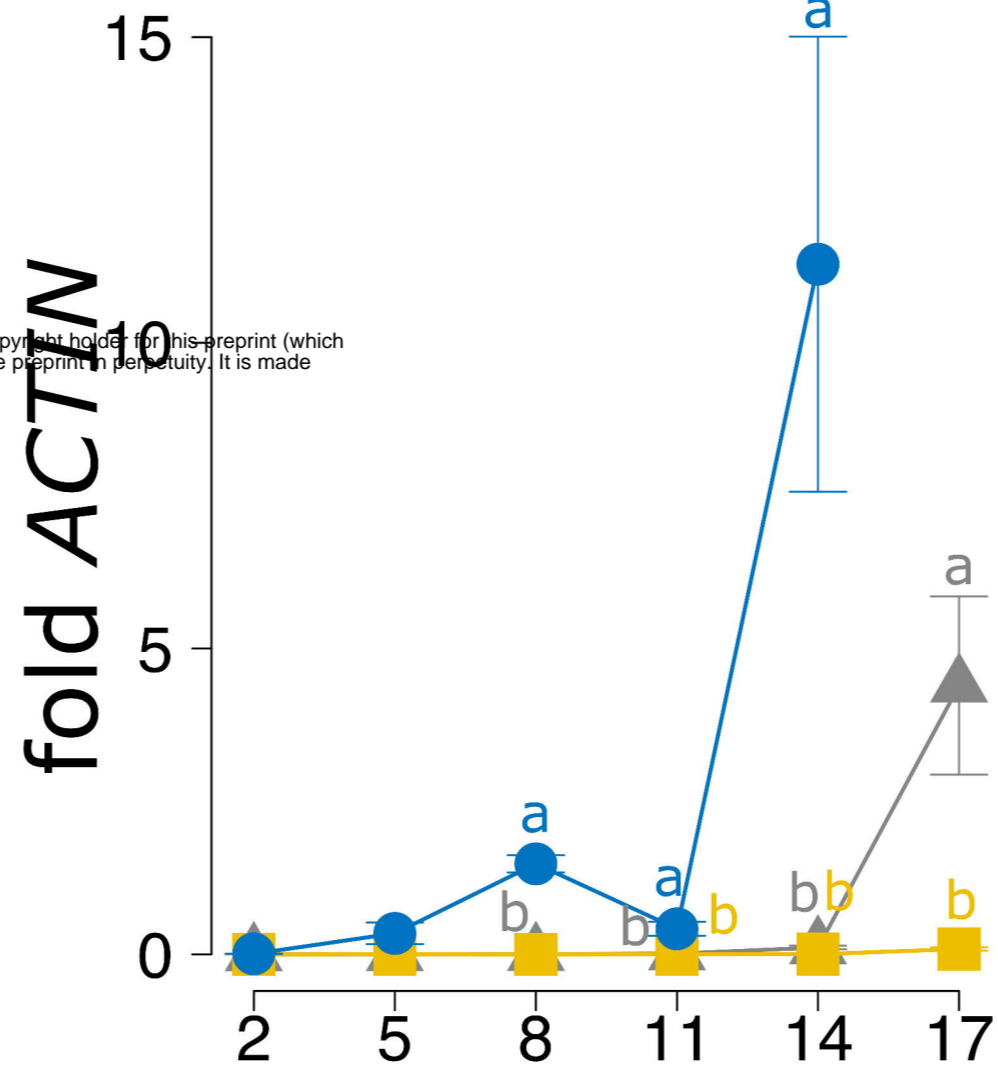

### FT2

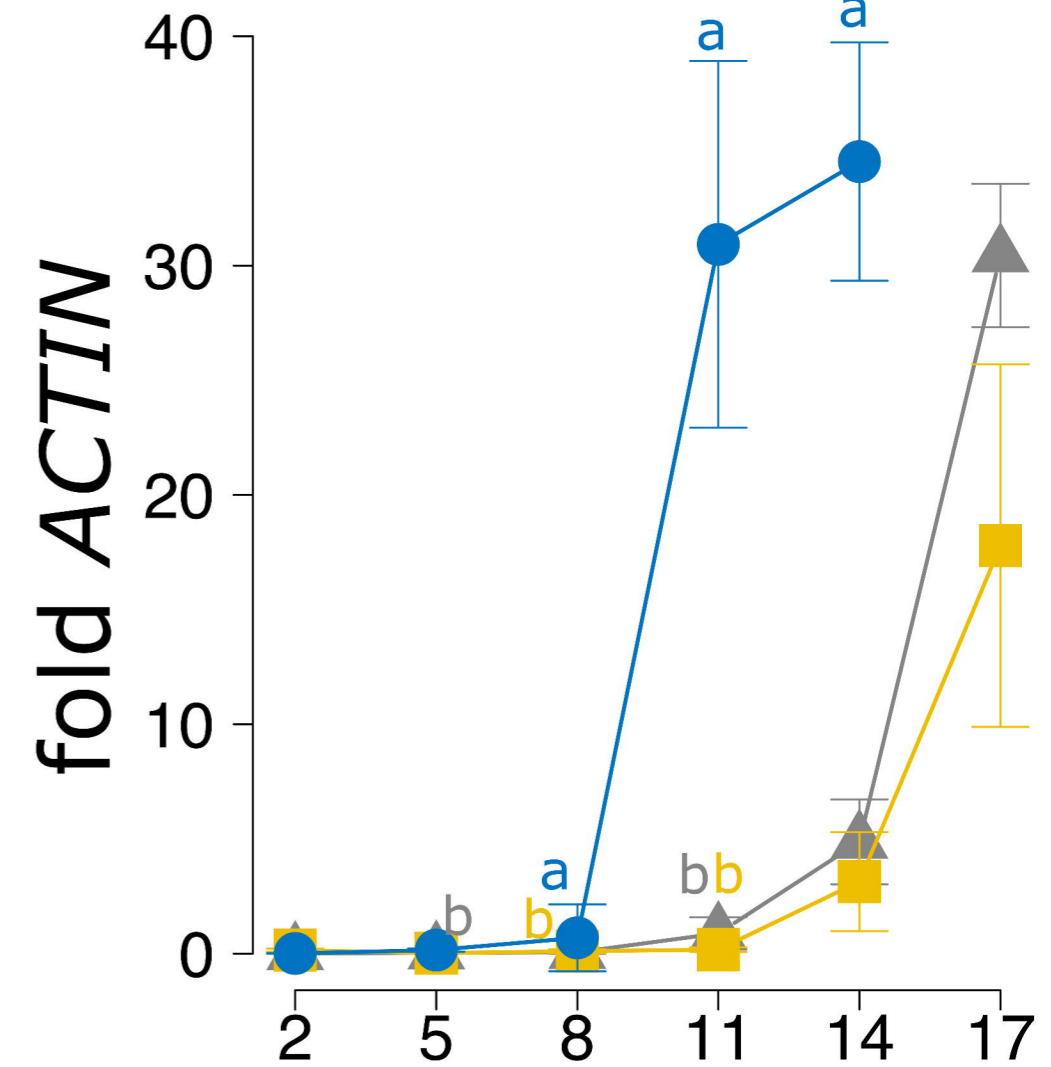

### FT-A3

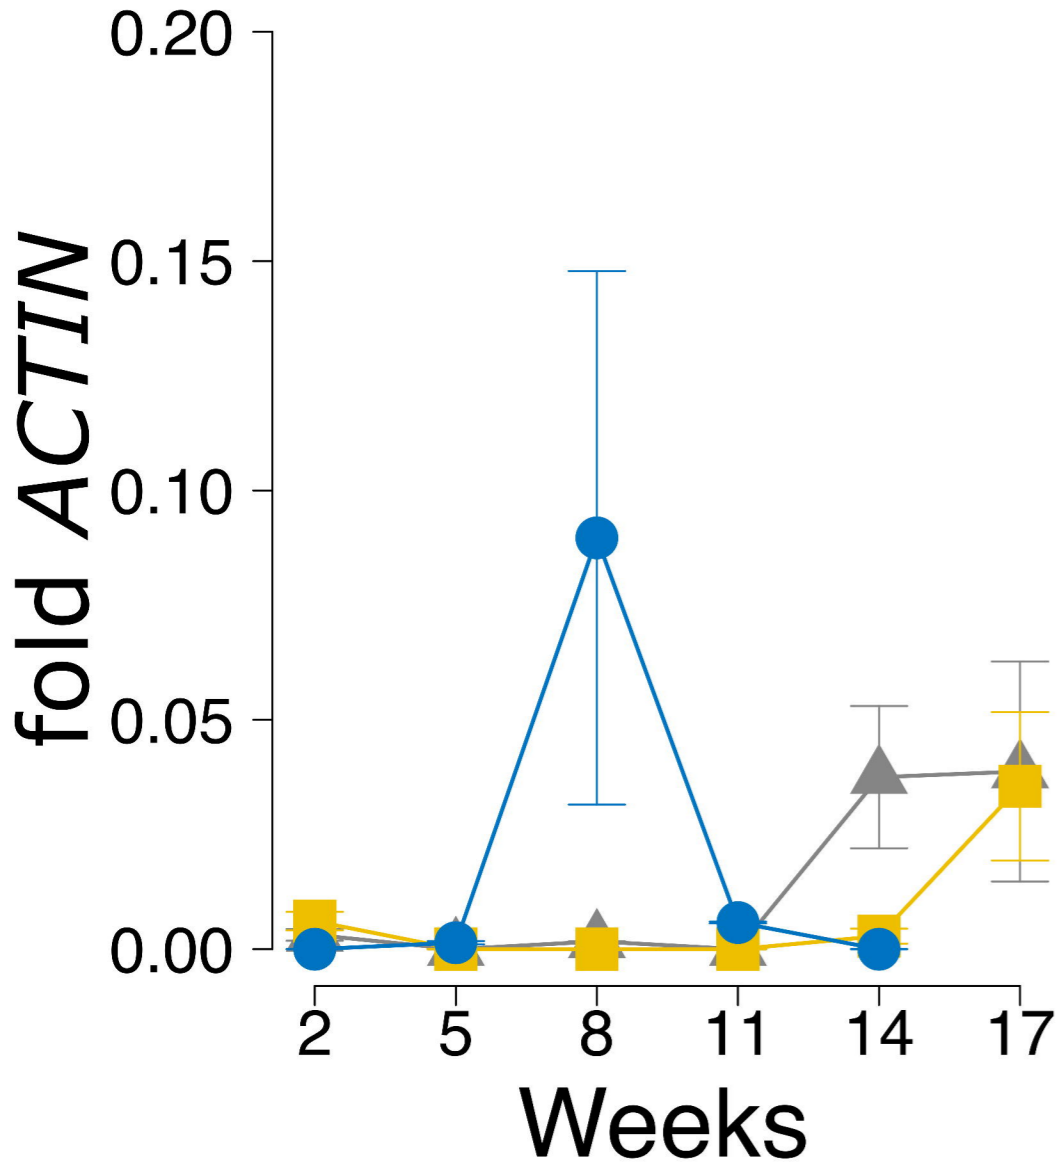

### FT-B3

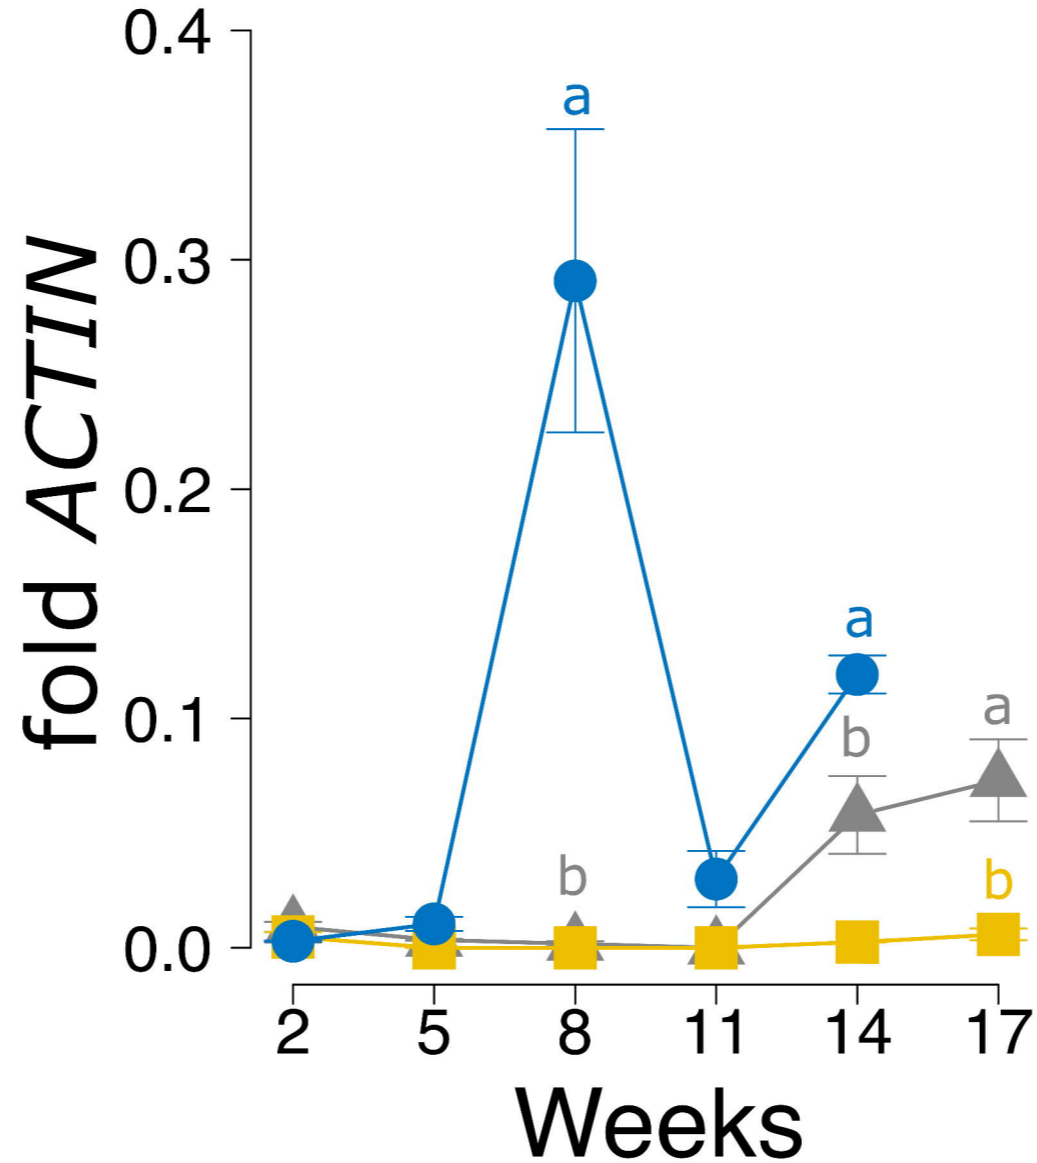

### VRN1

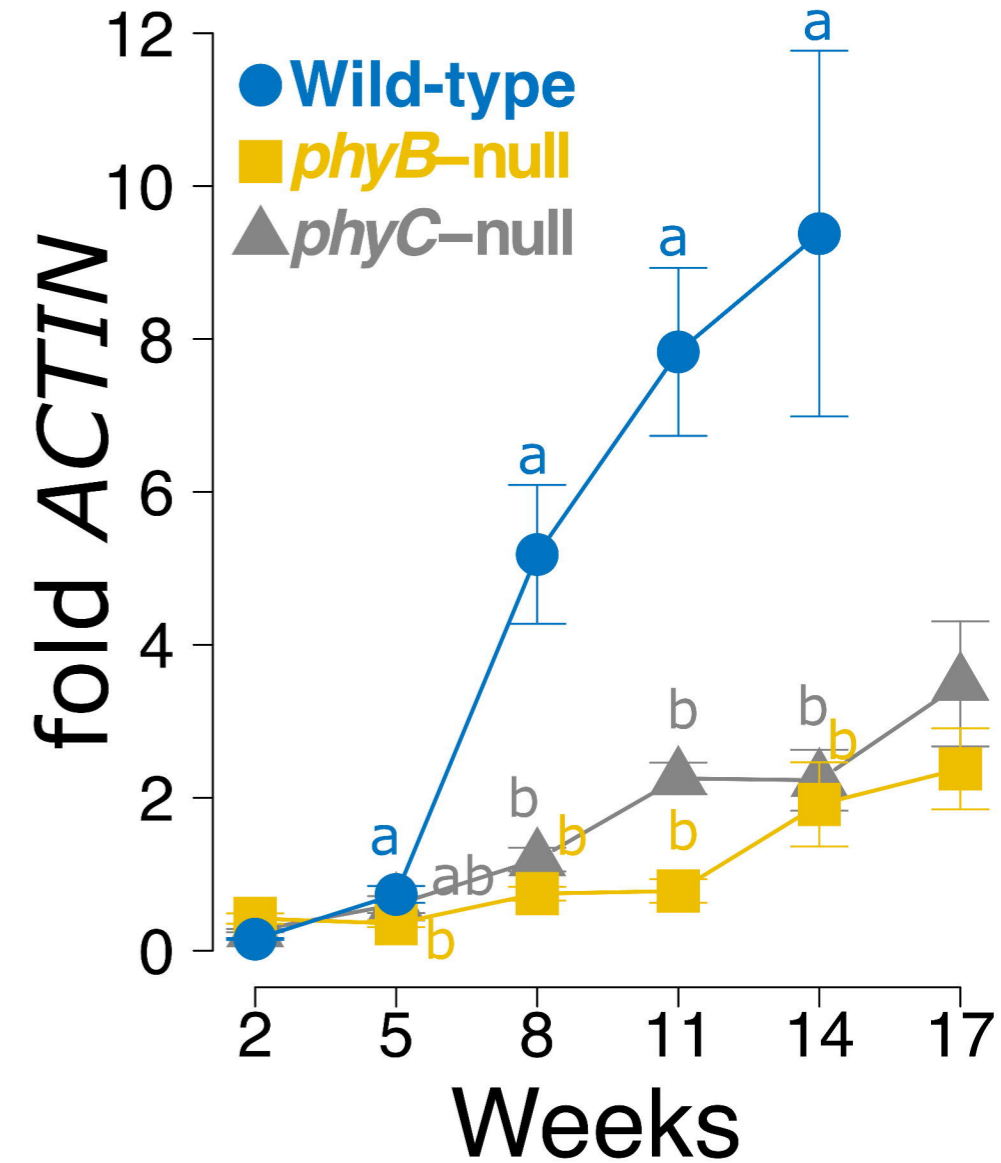



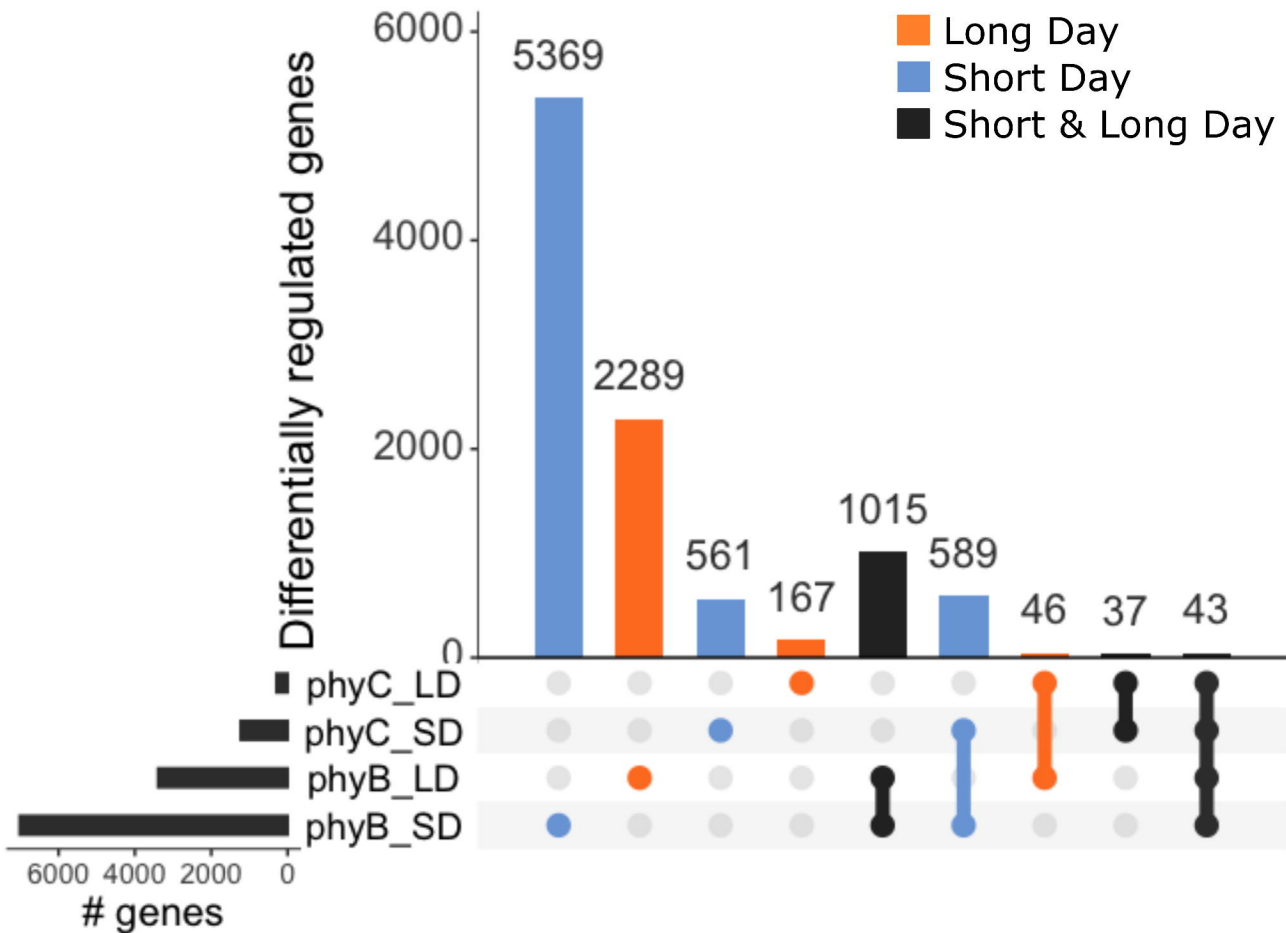

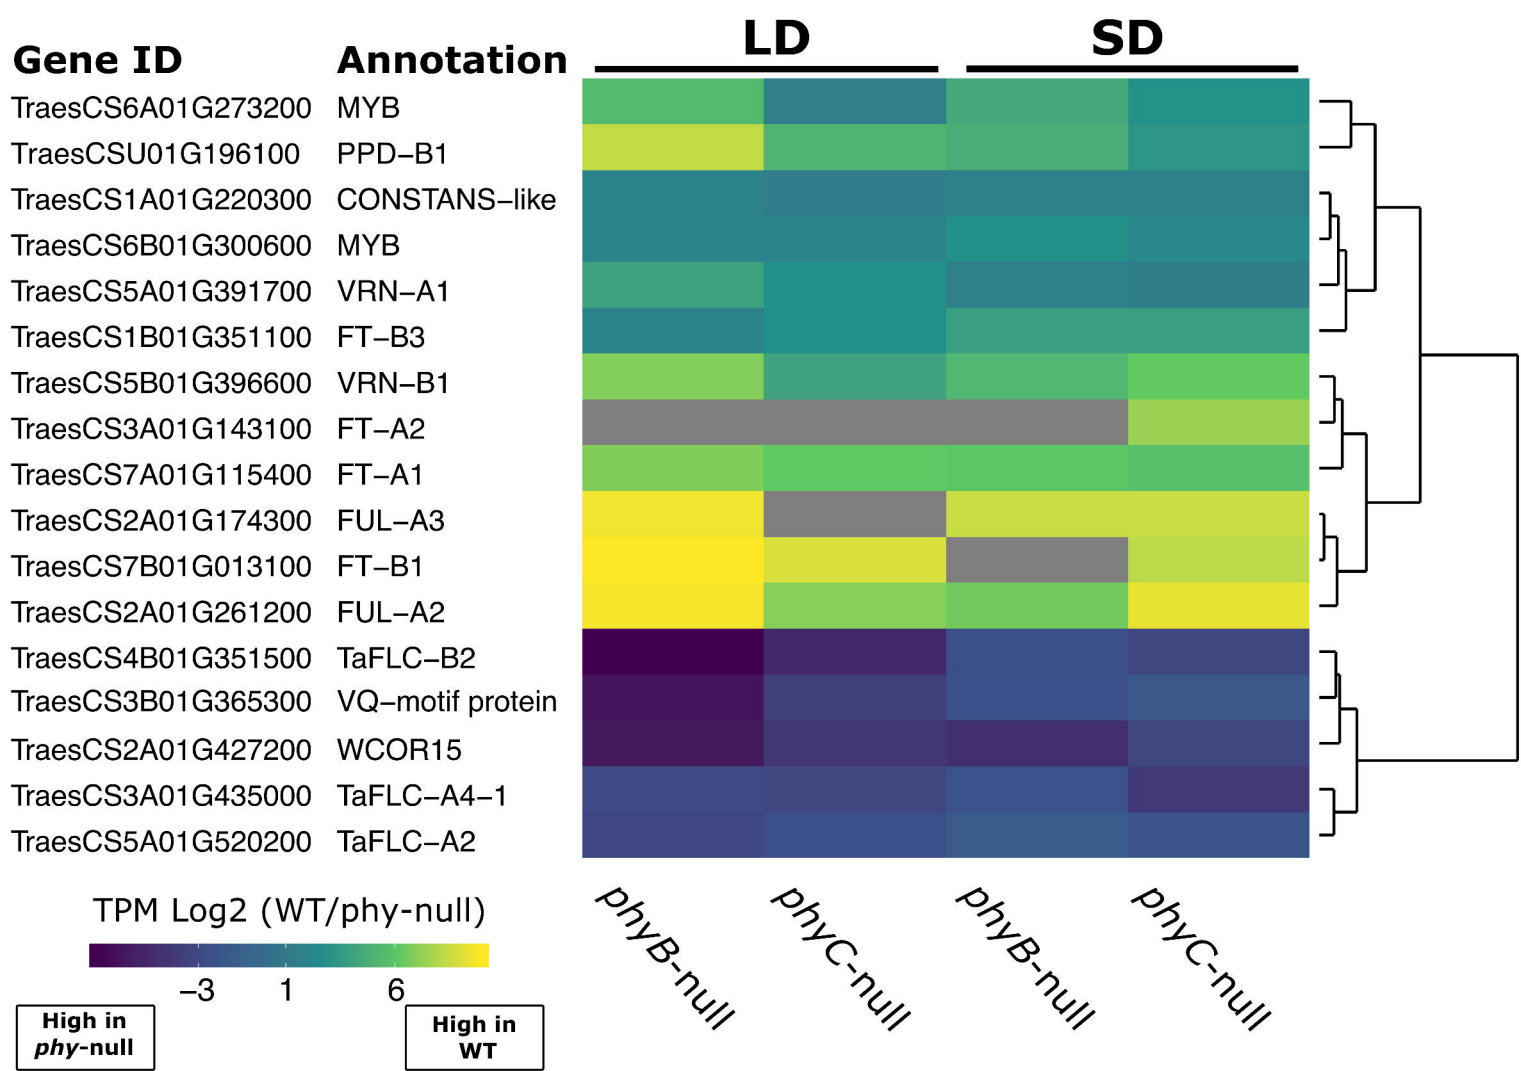

**(a)****Gene ID****Annotation****SD only**

|                    |             |
|--------------------|-------------|
| TraesCS7B01G158900 | TaFLC-B1    |
| TraesCS5B01G183700 | WRKY        |
| TraesCS3B01G240200 | WRKY        |
| TraesCS2A01G132300 | FT-A4       |
| TraesCS3B01G129900 | WRKY        |
| TraesCS7B01G131600 | MYB_related |
| TraesCS3B01G162000 | FT-B2       |
| TraesCS5B01G054800 | bHLH        |
| TraesCS3A01G347500 | WRKY        |
| TraesCS6A01G146900 | WRKY        |
| TraesCS1B01G374900 | WRKY        |
| TraesCS5B01G183800 | WRKY        |
| TraesCS3B01G199000 | WRKY        |
| TraesCS2B01G378700 | NF-YB       |
| TraesCS7A01G233300 | MYB_related |
| TraesCS7B01G249700 | WRKY        |
| TraesCS5A01G310700 | CBF         |
| TraesCS3A01G274900 | GATA        |
| TraesCS5A01G310800 | CBF         |
| TraesCS5A01G311100 | CBF         |
| TraesCS2A01G100600 | G2-like     |
| TraesCS1B01G335100 | CBF         |
| TraesCS6A01G143900 | BBox        |
| TraesCS1A01G334400 | GA-2oxidase |

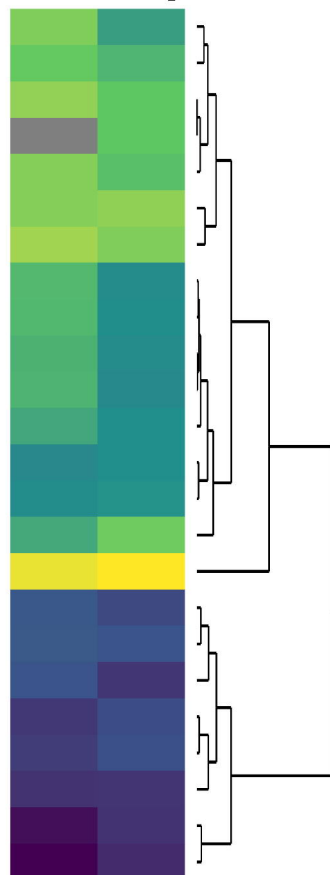TPM Log<sub>2</sub> (WT/phy-null)

-4

-1

2

5

High in  
*phy*-nullHigh in  
WT*phyB*-null*phyC*-null**(b)****Gene ID****Annotation****LD only**

|                    |            |
|--------------------|------------|
| TraesCS7B01G115200 | SPL        |
| TraesCS6B01G315400 | CO-like    |
| TraesCS3A01G107200 | TZF-A1     |
| TraesCS3B01G135400 | GIGANTEA-B |
| TraesCS3A01G116300 | GIGANTEA-A |

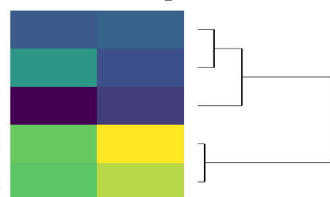TPM Log<sub>2</sub> (WT/phy-null)

-3.0

-2.0

-0.7

0.6

High in  
*phy*-nullHigh in  
WT*phyB*-null*phyC*-null

|                           | SD [8 w] |       |       | LD [4 w] |      |       | Photo | Genot | WT_vs_phy | Inter | Intero <sup>1</sup> |
|---------------------------|----------|-------|-------|----------|------|-------|-------|-------|-----------|-------|---------------------|
|                           | WT       | phyB  | phyC  | WT       | phyB | phyC  |       |       |           |       |                     |
| <i>VRN-A1</i>             | 103.84   | 33.61 | 39    | 145.83   | 11.8 | 13.98 | ****  | ****  | ****      | ****  | *                   |
| <i>VRN-B1</i>             | 12.17    | 0.18  | 0.23  | 14.49    | 0.18 | 0.12  | ns    | ****  | ****      | ns    | ns                  |
| <i>PPD-A1</i>             | 4.82     | 2.63  | 4.11  | 5.62     | 3.91 | 3.32  | ns    | **    | **        | ns    | ns                  |
| <i>PPD-B1</i>             | 10.2     | 0.4   | 1.03  | 14.61    | 0.06 | 0.34  | ****  | ****  | ****      | ****  | *                   |
| <i>FT-A1</i>              | 3.33     | 0     | 0.02  | 7.48     | 0.01 | 0.04  | ns    | ****  | ****      | ns    | ns                  |
| <i>FT-B1</i>              | 6.55     | 0     | 0.02  | 108.86   | 0.17 | 0.19  | ****  | ****  | ****      | ****  | **                  |
| <i>FT-A2</i>              | 4.38     | 0.12  | 0.06  | 11.52    | 0.25 | 0.29  | ns    | ****  | ****      | ns    | ns                  |
| <i>FT-B2</i>              | 0.96     | 0.04  | 0.08  | 0.75     | 0.15 | 0.03  | ns    | ****  | ****      | ns    | ns                  |
| <i>FT-B3</i> <sup>2</sup> | 5.22     | 0.36  | 0.37  | 3.7      | 0.65 | 0.71  | ns    | ****  | ****      | ns    | ns                  |
| <i>FUL-A2</i>             | 2.45     | 0.03  | 0.01  | 13.1     | 0.03 | 0.06  | **    | ****  | ****      | ns    | ns                  |
| <i>FUL-B2</i>             | 0.31     | 0.06  | 0.09  | 1.42     | 0    | 0     | ns    | ****  | ****      | **    | ns                  |
| <i>FUL-A3</i>             | 10.41    | 0.03  | 0.03  | 16.26    | 0.03 | 0.04  | ns    | ****  | ****      | ns    | ns                  |
| <i>FUL-B3</i>             | 18.8     | 0.02  | 0.13  | 35.73    | 0.1  | 0.13  | ns    | ****  | ****      | ns    | ns                  |
| <i>GI-A</i>               | 23.41    | 28.45 | 16.35 | 3.1      | 1.26 | 1.16  | ****  | ****  | ****      | ***   | ****                |
| <i>GI-B</i>               | 16.56    | 19.13 | 11.1  | 2.93     | 1.08 | 0.92  | ****  | ****  | ****      | ***   | ****                |
| <i>CO-A1</i>              | 1.7      | 3.14  | 2.85  | 0.41     | 6.58 | 4.54  | ns    | ****  | ****      | ****  | ****                |
| <i>CO-B1</i>              | 0.41     | 0.59  | 1.03  | 0.28     | 2.17 | 1.11  | ****  | ****  | ****      | ****  | ****                |
| <i>CO-A2</i>              | 0.03     | 0.1   | 0.06  | 0.51     | 0.71 | 0.64  | ****  | ns    | ns        | ns    | ns                  |
| <i>CO-B2</i>              | 2.91     | 2.95  | 3.04  | 8.27     | 9.16 | 7.73  | ****  | ns    | ns        | ns    | ns                  |

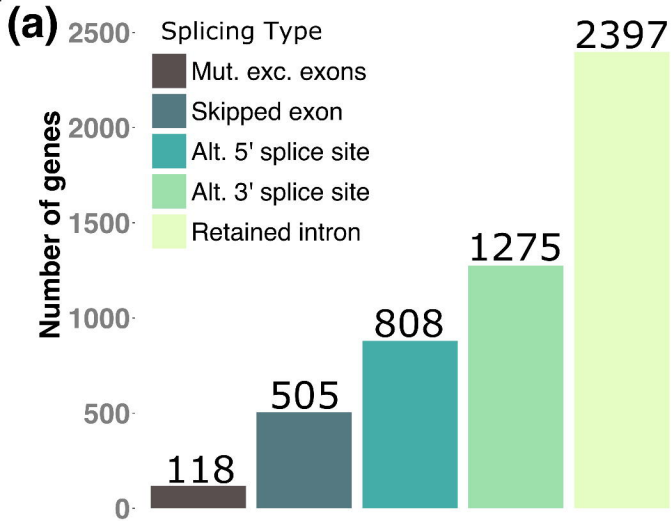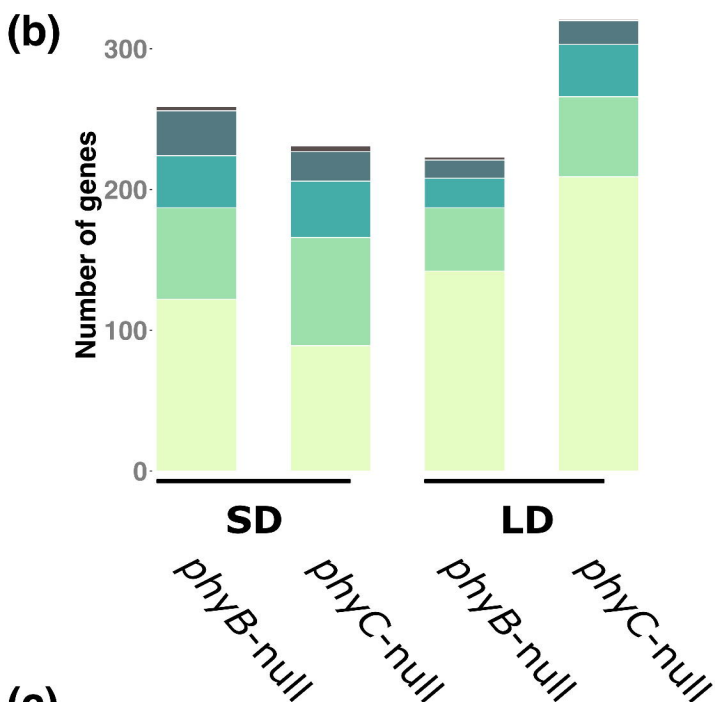

**(c)**

| Genotype            | DE only | AS only | DE and AS |
|---------------------|---------|---------|-----------|
| <i>phyB-null</i> SD | 7236    | 201     | 36        |
| <i>phyC-null</i> SD | 1498    | 189     | 13        |
| <i>phyB-null</i> LD | 3668    | 186     | 20        |
| <i>phyC-null</i> LD | 420     | 275     | 4         |
